# Supplementary material for: Development and Properties of Francisella tularensis Subsp. holarctica 15 NIIEG Vaccine Strain without the recD Gene
Source: MDPI journal article supplement (doi:10.3390/vaccines10010108), 2022-01-11

Supplementary 4. Electrophoregram of amplicons obtained on FCD/RCD primers and *F. tularensis* DNA: 15 NIEG – line 2, 15D – line 3. 100 bp plusDNA ladder (Fermentas)– line 1 and 4.

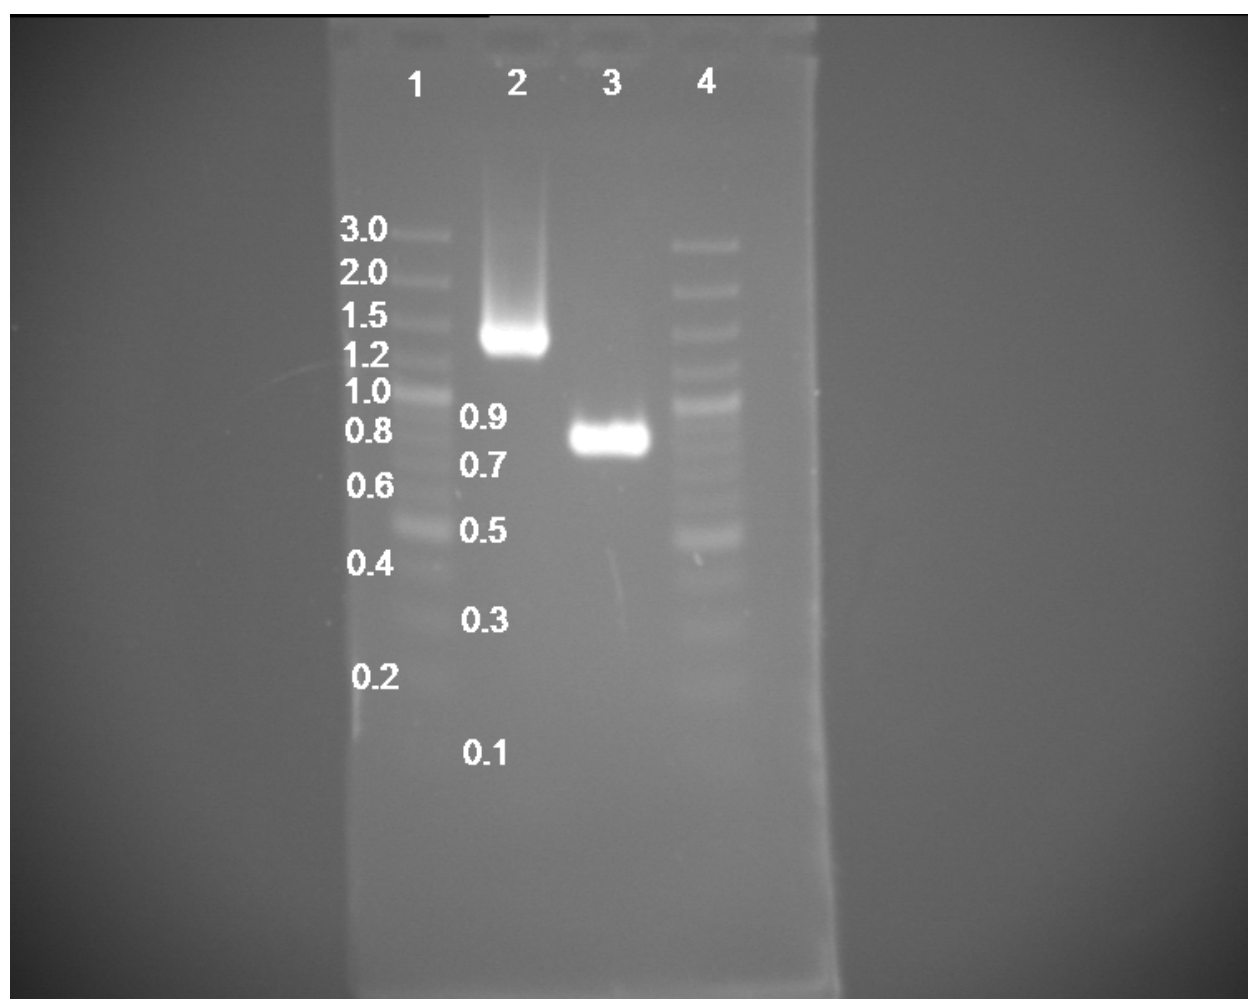

Supplement: s1 [file s1]
