# Supplementary material for: Development and Properties of Francisella tularensis Subsp. holarctica 15 NIIEG Vaccine Strain without the recD Gene
Source: MDPI journal article supplement (doi:10.3390/vaccines10010108), 2022-01-11
Supplement: s1 [file s1]

Supplementary 1.

Structure of the genome regions of *F. tularensis* and *E. coli* with *recBCD* genes

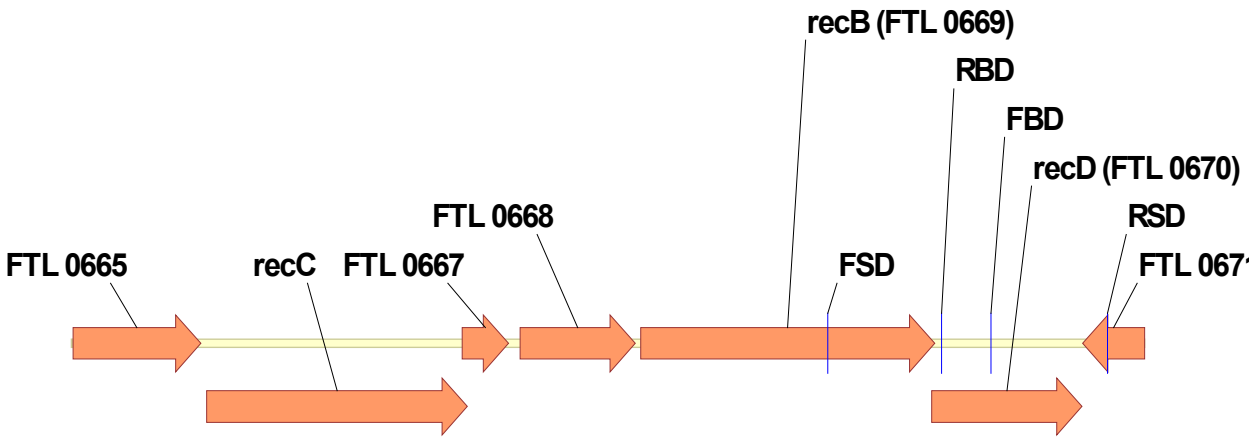

F tularensis LVS *recBCD* region  
13328 bp

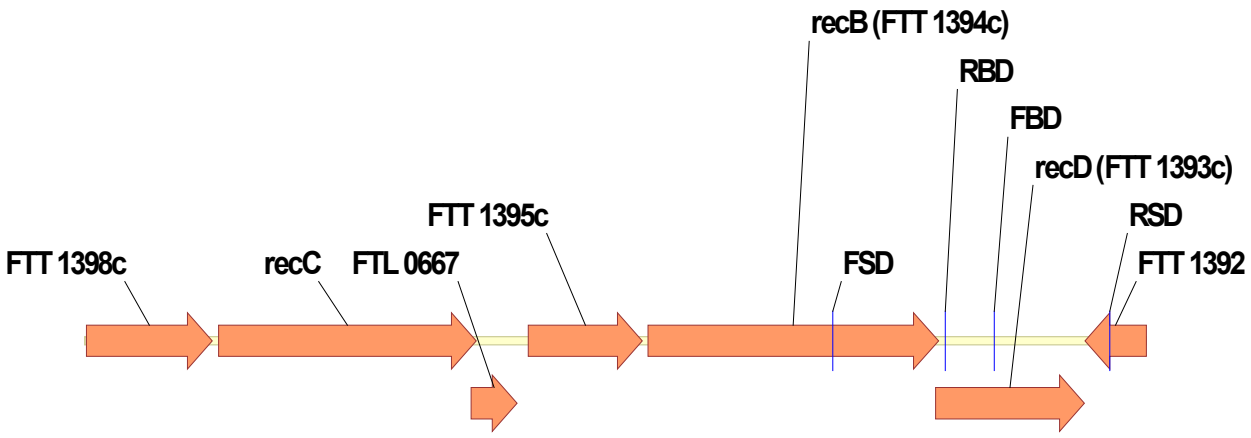

F tularensis SCHU S4 *recBCD* region  
13327 bp

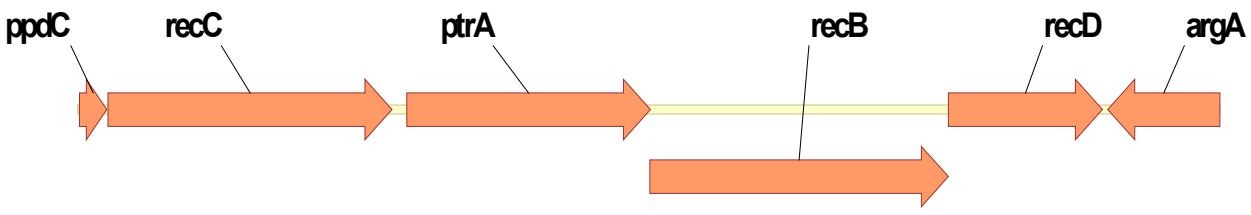

E coli K-12 MG1655 *recBCD* region  
13523 bp

Multiple alignment of the amino acid sequence of the RecD proteins of *F. tularensis* and *E. coli*.

| Strain                                            | RecD protein accession number |
|---------------------------------------------------|-------------------------------|
| <i>E. coli</i> K-12 MG1655                        | NP_417296.1                   |
| <i>F. tularensis</i> subsp. <i>holarctica</i> LVS | AJI59740.1                    |

|                                        |                                                     |              |
|----------------------------------------|-----------------------------------------------------|--------------|
|                                        | 1                                                   | 50           |
| <i>E. coli</i> _K-12_MG1655_RecD (1)   | -----MKLQKQLREAVE                                   |              |
| <i>F. tularensis</i> _LVS_RecD (1)     | MLVYLMEMIMYKTFHKACEQLADIRAIDFFFAKEVFDL              | MKKTTPSNTTIS |
| Consensus (1)                          |                                                     | MK L L       |
|                                        | 51                                                  | 100          |
| <i>E. coli</i> _K-12_MG1655_RecD (13)  | HKQLRPLDVQFALTWAGDEHPAVTLAAALSHDAGEGHVCLPLSRENN-    |              |
| <i>F. tularensis</i> _LVS_RecD (51)    | SESYPFFHGAKNDLEQKSNEILFHILMKMHVYSHGHSCLIKIADISNKT   |              |
| Consensus (51)                         | P A L L L H GH CL IA I N                            |              |
|                                        | 101                                                 | 150          |
| <i>E. coli</i> _K-12_MG1655_RecD (62)  | -EASHPLLATCVSEIGELQNWEECLLASQAVSRGDEPTPMILCGDRIYIN  |              |
| <i>F. tularensis</i> _LVS_RecD (101)   | IFASEQSNQSDAKVGFKMPSSDKIASILDNIYDNLPIYFAKQYDSLYTK   |              |
| Consensus (101)                        | AS S L D L P D LYI                                  |              |
|                                        | 151                                                 | 200          |
| <i>E. coli</i> _K-12_MG1655_RecD (111) | RMWCNERTVRRFFNEVNHAIEVDALLAQTLDKLFPVSDIEINWQVAAAV   |              |
| <i>F. tularensis</i> _LVS_RecD (151)   | RLWNYENETANFIKLKTIQNTQKNRIEEVVDKLEPEAGEINWQQAQVIK   |              |
| Consensus (151)                        | RLW E IA F D I LDKLF A EINWQ A                      |              |
|                                        | 201                                                 | 250          |
| <i>E. coli</i> _K-12_MG1655_RecD (161) | ALTRRISVISGGPGTGKTTTVAKLIALIQADGERCRIRLAAPTGKAAA    |              |
| <i>F. tularensis</i> _LVS_RecD (201)   | SINYNFSIISGGPGTGKTTTVAKLIALQMINQ-NQQRIALAPTGKAAQ    |              |
| Consensus (201)                        | AL SIISGGPGTGKTTTVAKL AI L RI L APTGKAA             |              |
|                                        | 251                                                 | 300          |
| <i>E. coli</i> _K-12_MG1655_RecD (211) | RLTESLKGALR-----QLPLTDEQKK-----RIPEAS               |              |
| <i>F. tularensis</i> _LVS_RecD (250)   | RMTESLKNLTATVIPSSLTTESTIQKNDIFKQVQDELNSVAQYLNLEAQ   |              |
| Consensus (251)                        | RLTESL L Q Q DA                                     |              |
|                                        | 301                                                 | 350          |
| <i>E. coli</i> _K-12_MG1655_RecD (239) | TIHRLIGAOFGSQRLLRHAGNPLHLDVIVDEASMDIPMSRLIDALPD     |              |
| <i>F. tularensis</i> _LVS_RecD (300)   | TIHRLGLRNSSTYVKYNQSKAPFDVIIVDEASMDMNFIKLIRAVAD      |              |
| Consensus (301)                        | TIHR LG P S LKH DVIIVDEASMDL I KLI AL D             |              |
|                                        | 351                                                 | 400          |
| <i>E. coli</i> _K-12_MG1655_RecD (289) | HARVIFLIGDRDQLASVEAGAVLGDICAYANAGFTAERARQLSRLTGTHVP |              |
| <i>F. tularensis</i> _LVS_RecD (350)   | NTKLILLIGDTNQLPSVEAGSLLANFTHDKYQ-----               |              |
| Consensus (351)                        | KLI IGD QL SVEAGALLA A                              |              |
|                                        | 401                                                 | 450          |
| <i>E. coli</i> _K-12_MG1655_RecD (339) | AGTGTEAASIRDSLCLLQKSYRFGSDSGIGQLAAAINRGDKTAVKTVFQQ  |              |
| <i>F. tularensis</i> _LVS_RecD (381)   | -----SITPYTTLIKNYRS--QQYINNLAASVLKGVNIDS---Q        |              |
| Consensus (401)                        | SI LL K YR I NLAAAI KGD Q                           |              |
|                                        | 451                                                 | 500          |
| <i>E. coli</i> _K-12_MG1655_RecD (389) | DFTDTEKRLIQSGEDYIAMLEEAAGYGRYLDLLQARAPDLIQAFNEY     |              |
| <i>F. tularensis</i> _LVS_RecD (417)   | QNENIKFHSIRN-----LDIYIREYAKRYSQLEKCRYKEALTENKE      |              |
| Consensus (451)                        | I L LD L YAK L D I N F                              |              |
|                                        | 501                                                 | 550          |
| <i>E. coli</i> _K-12_MG1655_RecD (439) | QLICALREGPFGVAGLNERIEQFMQQKRKIHRHPHSRWYEGRPVMTIARD  |              |
| <i>F. tularensis</i> _LVS_RecD (460)   | RILVANKNLEIGTDKLNQKIEKFM-----KPIDSNYKCKPIMITQNS     |              |
| Consensus (501)                        | IL A K G LN KIE FM P Y GKPMI N                      |              |
|                                        | 551                                                 | 600          |
| <i>E. coli</i> _K-12_MG1655_RecD (489) | SALGLFNGDIGIALDRQG-TRVWFAMPDGNIKSVQPSRLPEHEETWAMT   |              |
| <i>F. tularensis</i> _LVS_RecD (503)   | YSLGLFNGDIGIMWPDDTGKLRAEDGKDAKAFSLN--MLEKYEVSVMAMT  |              |
| Consensus (551)                        | ALGLFNGDIGI G R WF DA SLN LP HES WAMT               |              |
|                                        | 601                                                 | 650          |
| <i>E. coli</i> _K-12_MG1655_RecD (538) | VHKSQGSEFDHAAIILPFSQRTPVVTRELVTAVTRARRRSLYADERILS   |              |
| <i>F. tularensis</i> _LVS_RecD (551)   | IHKIQGSEFDEIVLILPAEDNEALSKQLLYTAITRAKYKLTIIISQSSLR  |              |
| Consensus (601)                        | IHKSQGSEFD IILPA LSK LLYTAITRAK KLSI AD L           |              |
|                                        | 651                                                 | 672          |
| <i>E. coli</i> _K-12_MG1655_RecD (588) | AAIATRTERRSGLAALFSSRE-                              |              |
| <i>F. tularensis</i> _LVS_RecD (601)   | DIAQKDINRNSNISELVSLSTQ                              |              |
| Consensus (651)                        | R S IA L S                                          |              |
