# Supplementary material for: Development and Properties of Francisella tularensis Subsp. holarctica 15 NIIEG Vaccine Strain without the recD Gene
Source: MDPI journal article supplement (doi:10.3390/vaccines10010108), 2022-01-11
Supplement: s1 [file s1]

**Supplementary 2. Comparison of the *recBCD* regions of *Francisella tularensis* subsp. *holarctica* LVS and *Francisella tularensis* subsp. *holarctica* 15 NIEG**

**Francisella tularensis subsp. holarctica LVS, complete genome**  
Sequence ID: [CP009694.1](#) Length: 1892177 Number of Matches: 1  
Range 1: 1371162 to 1384489 [GenBankGraphics](#) [Next Match](#) [Previous Match](#)

**Query - Francisella tularensis subsp. holarctica 15 NIEG**

**Alignment statistics for match #1**

| Score             | Expect                                                       | Identities        | Gaps        |
|-------------------|--------------------------------------------------------------|-------------------|-------------|
| 24613 bits(13328) | 0.0                                                          | 13328/13328(100%) | 0/13328(0%) |
| Query 1           | ATGCATATAAGTGAGCGCCGTAAATGGTATATAGGCTTTGCTGTTTTTGTGATGGTGATT | 60                |             |
|                   |                                                              |                   |             |
| Sbjct 1371162     | ATGCATATAAGTGAGCGCCGTAAATGGTATATAGGCTTTGCTGTTTTTGTGATGGTGATT | 1371221           |             |
| Query 61          | TTATTATCGCTTTCAC TACTTCATGCTTCAATATGGTTTAGTATAGGGTTGTGCGTGTT | 120               |             |
|                   |                                                              |                   |             |
| Sbjct 1371222     | TTATTATCGCTTTCAC TACTTCATGCTTCAATATGGTTTAGTATAGGGTTGTGCGTGTT | 1371281           |             |
| Query 121         | TTGGCAGTGATCGCAATCTATGATGTTAGCCAAACAAAGCATTC CATCCTAAGAACTTT | 180               |             |
|                   |                                                              |                   |             |
| Sbjct 1371282     | TTGGCAGTGATCGCAATCTATGATGTTAGCCAAACAAAGCATTC CATCCTAAGAACTTT | 1371341           |             |
| Query 181         | CCTATAGTAGGACATATGCGCTATATACTTGAGTTTTTACGTCCTGAAATTCAGCAGTAT | 240               |             |
|                   |                                                              |                   |             |
| Sbjct 1371342     | CCTATAGTAGGACATATGCGCTATATACTTGAGTTTTTACGTCCTGAAATTCAGCAGTAT | 1371401           |             |
| Query 241         | TTCATTGCTGATAATGAGAGTGAAAAGCCATTTGGTAGAGAGCTACGTTGACAATCTAC  | 300               |             |
|                   |                                                              |                   |             |
| Sbjct 1371402     | TTCATTGCTGATAATGAGAGTGAAAAGCCATTTGGTAGAGAGCTACGTTGACAATCTAC  | 1371461           |             |
| Query 301         | CGTCGTGCTAAGGGTATTAATGATACTGTTGCTTTTGGAACAGAGAAAGATATTTATAGG | 360               |             |
|                   |                                                              |                   |             |
| Sbjct 1371462     | CGTCGTGCTAAGGGTATTAATGATACTGTTGCTTTTGGAACAGAGAAAGATATTTATAGG | 1371521           |             |
| Query 361         | GTTGGTTATGAATGGGTAACACATTCAC TCATGCCTAAGCATCTTGATGAAATTGAACT | 420               |             |
|                   |                                                              |                   |             |
| Sbjct 1371522     | GTTGGTTATGAATGGGTAACACATTCAC TCATGCCTAAGCATCTTGATGAAATTGAACT | 1371581           |             |
| Query 421         | CGAGTTAAAATTGGTGGTTCTGATTGTAAACAACCATATATGGCATCGCATCTAAATATA | 480               |             |
|                   |                                                              |                   |             |
| Sbjct 1371582     | CGAGTTAAAATTGGTGGTTCTGATTGTAAACAACCATATATGGCATCGCATCTAAATATA | 1371641           |             |
| Query 481         | TCTGCGATGAGTTTGGGGCATTATCTGCTAATGCCGTTATGGCTTTGAATAAGGGAGCT  | 540               |             |
|                   |                                                              |                   |             |
| Sbjct 1371642     | TCTGCGATGAGTTTGGGGCATTATCTGCTAATGCCGTTATGGCTTTGAATAAGGGAGCT  | 1371701           |             |
| Query 541         | AAACTTGGAGGGTTTTATCAATGTACAGGTGAGGGCGGCTTGACTAAATATCATTTACAA | 600               |             |

|       |         |                                                               |         |
|-------|---------|---------------------------------------------------------------|---------|
|       |         |                                                               |         |
| Sbjct | 1371702 | AAACTTGGAGGGTTTATCAATGTACAGGTGAGGGCGGCTTGACTAAATATCATTTACAA   | 1371761 |
| Query | 601     | GGTGGAGATCTTGTATTTCAAATTGGTACAGGCTATTTTGGCTGTCGTACTGATGATGGC  | 660     |
|       |         |                                                               |         |
| Sbjct | 1371762 | GGTGGAGATCTTGTATTTCAAATTGGTACAGGCTATTTTGGCTGTCGTACTGATGATGGC  | 1371821 |
| Query | 661     | AAGTTCTCAGCAGAGAAATTTGTTGAAAAAGCAAATTTAGATAGAGTCAAATGATAGAA   | 720     |
|       |         |                                                               |         |
| Sbjct | 1371822 | AAGTTCTCAGCAGAGAAATTTGTTGAAAAAGCAAATTTAGATAGAGTCAAATGATAGAA   | 1371881 |
| Query | 721     | ATTAAGTTATCTCAAGGGGCTAAACCATCTCATGGCGGGGTTTTGCCAGCAGCTAAGATA  | 780     |
|       |         |                                                               |         |
| Sbjct | 1371882 | ATTAAGTTATCTCAAGGGGCTAAACCATCTCATGGCGGGGTTTTGCCAGCAGCTAAGATA  | 1371941 |
| Query | 781     | ACTCCAGAAATTGCTGAAATTAGGGGTGTTTCAATGGGCAAAGATGTACTATCACCTCCT  | 840     |
|       |         |                                                               |         |
| Sbjct | 1371942 | ACTCCAGAAATTGCTGAAATTAGGGGTGTTTCAATGGGCAAAGATGTACTATCACCTCCT  | 1372001 |
| Query | 841     | GCGCATAGTGCTTTTTCGACACCGATAGAATTTTGCTATTTTCATTAAACAGCTAAGAGAT | 900     |
|       |         |                                                               |         |
| Sbjct | 1372002 | GCGCATAGTGCTTTTTCGACACCGATAGAATTTTGCTATTTTCATTAAACAGCTAAGAGAT | 1372061 |
| Query | 901     | CTTTCTAATGGCAAACCAATAGGGTTTAAGCTATGTATTGGTAGTCATGTTGAGTTTTTA  | 960     |
|       |         |                                                               |         |
| Sbjct | 1372062 | CTTTCTAATGGCAAACCAATAGGGTTTAAGCTATGTATTGGTAGTCATGTTGAGTTTTTA  | 1372121 |
| Query | 961     | GCTATTTGTAAAGCAATGCTTGAGACAGGAATAAGACCTGATTTTATAACTGTTGATGGC  | 1020    |
|       |         |                                                               |         |
| Sbjct | 1372122 | GCTATTTGTAAAGCAATGCTTGAGACAGGAATAAGACCTGATTTTATAACTGTTGATGGC  | 1372181 |
| Query | 1021    | GCTGATGGTGGTACAGGGCGGCACCACTTGAGTTCTCTAATCATATTGGTATGCCTTTA   | 1080    |
|       |         |                                                               |         |
| Sbjct | 1372182 | GCTGATGGTGGTACAGGGCGGCACCACTTGAGTTCTCTAATCATATTGGTATGCCTTTA   | 1372241 |
| Query | 1081    | GAAGATAGTTTAATCTTTGTGCATAATGCTTTGGTTGGTTGTGGCTTACGTGATGAGATT  | 1140    |
|       |         |                                                               |         |
| Sbjct | 1372242 | GAAGATAGTTTAATCTTTGTGCATAATGCTTTGGTTGGTTGTGGCTTACGTGATGAGATT  | 1372301 |
| Query | 1141    | CGTATAATTGCAAGTAGTAAAGTAGCTACAGGTTTTGATATGGTGAGGTTATTTGCTATG  | 1200    |
|       |         |                                                               |         |
| Sbjct | 1372302 | CGTATAATTGCAAGTAGTAAAGTAGCTACAGGTTTTGATATGGTGAGGTTATTTGCTATG  | 1372361 |
| Query | 1201    | GGAGCAGATACTTGTAACCTAGCTAGAGCAATGATGCTTGCTATCGGCTGTATTTCAGTCA | 1260    |
|       |         |                                                               |         |
| Sbjct | 1372362 | GGAGCAGATACTTGTAACCTAGCTAGAGCAATGATGCTTGCTATCGGCTGTATTTCAGTCA | 1372421 |
| Query | 1261    | CGACAGTGTAAATAACAACACTTGTCAGTTGGTGTGCTACACAAAATCCACGTCTTGAA   | 1320    |

|       |         |                                                               |         |
|-------|---------|---------------------------------------------------------------|---------|
|       |         |                                                               |         |
| Sbjct | 1372422 | CGACAGTGTAAATAACAACACTTGTCCAGTTGGTGTGCTACACAAAATCCACGTCTTGAA  | 1372481 |
| Query | 1321    | AAAGCTTTGGTAGTTGAAGACAAAATGTATCGAGTTTATAATTTTCATAAAGTTACAATT  | 1380    |
|       |         |                                                               |         |
| Sbjct | 1372482 | AAAGCTTTGGTAGTTGAAGACAAAATGTATCGAGTTTATAATTTTCATAAAGTTACAATT  | 1372541 |
| Query | 1381    | CAATCTTGTTTAGAAATTATTGGAGCTATGGGGCTTATTTCTACTGATGATGTTGAGCCA  | 1440    |
|       |         |                                                               |         |
| Sbjct | 1372542 | CAATCTTGTTTAGAAATTATTGGAGCTATGGGGCTTATTTCTACTGATGATGTTGAGCCA  | 1372601 |
| Query | 1441    | GAAAACCTTAAAAAGCGTATATCTGTAAATGAGATTAAATCATATGCAGATCTGTATGAT  | 1500    |
|       |         |                                                               |         |
| Sbjct | 1372602 | GAAAACCTTAAAAAGCGTATATCTGTAAATGAGATTAAATCATATGCAGATCTGTATGAT  | 1372661 |
| Query | 1501    | TTTATTCCAGAGAGATGTTTAGTCGATGGTAATATCCCAGCTAGTTTTCGAAGATCTTGG  | 1560    |
|       |         |                                                               |         |
| Sbjct | 1372662 | TTTATTCCAGAGAGATGTTTAGTCGATGGTAATATCCCAGCTAGTTTTCGAAGATCTTGG  | 1372721 |
| Query | 1561    | GAAAAGGCTCGAGCTGATTCTTTTAGTTTCTGAATATAAATAAATTTTGTCTAATC      | 1620    |
|       |         |                                                               |         |
| Sbjct | 1372722 | GAAAAGGCTCGAGCTGATTCTTTTAGTTTCTGAATATAAATAAATTTTGTCTAATC      | 1372781 |
| Query | 1621    | AATTGCTAAAATAGCTTCTATAAGTATTCTGATTAATCAAGCATGGCACTATACACTTA   | 1680    |
|       |         |                                                               |         |
| Sbjct | 1372782 | AATTGCTAAAATAGCTTCTATAAGTATTCTGATTAATCAAGCATGGCACTATACACTTA   | 1372841 |
| Query | 1681    | CCCATCAAATAAACTTGAGTATCTTGTACAAGTTCTATCTAAACTTCTAGATGTTGaaaa  | 1740    |
|       |         |                                                               |         |
| Sbjct | 1372842 | CCCATCAAATAAACTTGAGTATCTTGTACAAGTTCTATCTAAACTTCTAGATGTTGAAAA  | 1372901 |
| Query | 1741    | aaaaGATTTATTTACACCAACACAGTTAATTGTTGGTAGCCGTGGTATGCAACATTGGTT  | 1800    |
|       |         |                                                               |         |
| Sbjct | 1372902 | AAAAGATTTATTTACACCAACACAGTTAATTGTTGGTAGCCGTGGTATGCAACATTGGTT  | 1372961 |
| Query | 1801    | AAGTATGCAACTAGCCGAATATCGCAATATTGCAATGAATCTCAAAATATGACATGATAAA | 1860    |
|       |         |                                                               |         |
| Sbjct | 1372962 | AAGTATGCAACTAGCCGAATATCGCAATATTGCAATGAATCTCAAAATATGACATGATAAA | 1373021 |
| Query | 1861    | TGGTTATATACTTGATATCTGCTATGAACTCACAGCAAAACAAGAATATAAAAAAGCATA  | 1920    |
|       |         |                                                               |         |
| Sbjct | 1373022 | TGGTTATATACTTGATATCTGCTATGAACTCACAGCAAAACAAGAATATAAAAAAGCATA  | 1373081 |
| Query | 1921    | TACAAAAGATATTTTAGCTTGGAGAGTTTTTAGGTTGCTATCTAGCCAAAATCAGGaaaa  | 1980    |
|       |         |                                                               |         |
| Sbjct | 1373082 | TACAAAAGATATTTTAGCTTGGAGAGTTTTTAGGTTGCTATCTAGCCAAAATCAGGAAAA  | 1373141 |
| Query | 1981    | aaaCACTCATTCACGCGAGGTGGGAATCTCATAGCTGATGGATTAAGTTCAAAAGATAC   | 2040    |

|       |         |                                                              |         |
|-------|---------|--------------------------------------------------------------|---------|
|       |         |                                                              |         |
| Sbjct | 1373142 | AAACACTCATTTCCACGCGAGGTGGAATCTCATAGCTGATGGATTAAGTTCAAAAGATAC | 1373201 |
| Query | 2041    | TAGCCTACGCAGGTATGACAATAGAGATGGTTGGAGTAGTAAGCTTAAAGAGTACTACCA | 2100    |
|       |         |                                                              |         |
| Sbjct | 1373202 | TAGCCTACGCAGGTATGACAATAGAGATGGTTGGAGTAGTAAGCTTAAAGAGTACTACCA | 1373261 |
| Query | 2101    | AGATAGTGATCTCAAAAAATATCAGTTGTCAGTTAAAATAGCAGAGACCTTCTCAAAATA | 2160    |
|       |         |                                                              |         |
| Sbjct | 1373262 | AGATAGTGATCTCAAAAAATATCAGTTGTCAGTTAAAATAGCAGAGACCTTCTCAAAATA | 1373321 |
| Query | 2161    | TATATCATATCGTAGTGAGTGGCTACAAAAGTGGGAGAAGGACGAATATATAAATCCCTC | 2220    |
|       |         |                                                              |         |
| Sbjct | 1373322 | TATATCATATCGTAGTGAGTGGCTACAAAAGTGGGAGAAGGACGAATATATAAATCCCTC | 1373381 |
| Query | 2221    | TAAACTAGAGAATGATGAAGATTGGCAGATGCTAATTTGGCAGAATCTTGTCAAAGATAT | 2280    |
|       |         |                                                              |         |
| Sbjct | 1373382 | TAAACTAGAGAATGATGAAGATTGGCAGATGCTAATTTGGCAGAATCTTGTCAAAGATAT | 1373441 |
| Query | 2281    | TGCAGAAACACCATATAAAGTCCAATTAGAAGCACTTCAAAAGCTTGATAAAACAAACTT | 2340    |
|       |         |                                                              |         |
| Sbjct | 1373442 | TGCAGAAACACCATATAAAGTCCAATTAGAAGCACTTCAAAAGCTTGATAAAACAAACTT | 1373501 |
| Query | 2341    | AGAAAAATTAAATATACCTAGTGATATTTATATATTTGGAGTTAACACAATATCTCCAAA | 2400    |
|       |         |                                                              |         |
| Sbjct | 1373502 | AGAAAAATTAAATATACCTAGTGATATTTATATATTTGGAGTTAACACAATATCTCCAAA | 1373561 |
| Query | 2401    | AAATCTTAAATTTATATTTGAATTAGCTAAGTATATTAATGTACATATTCTATATATTAA | 2460    |
|       |         |                                                              |         |
| Sbjct | 1373562 | AAATCTTAAATTTATATTTGAATTAGCTAAGTATATTAATGTACATATTCTATATATTAA | 1373621 |
| Query | 2461    | TCCATGTAGTGAGTATTGGTATGATTTGCATAAAAGTAAATATCAGCTTGGTTAGATAG  | 2520    |
|       |         |                                                              |         |
| Sbjct | 1373622 | TCCATGTAGTGAGTATTGGTATGATTTGCATAAAAGTAAATATCAGCTTGGTTAGATAG  | 1373681 |
| Query | 2521    | TGATGACTATGAAATTCAACCACTTTTGGCAAATCTTGGACAGCAGGGTAAAGAATTTT  | 2580    |
|       |         |                                                              |         |
| Sbjct | 1373682 | TGATGACTATGAAATTCAACCACTTTTGGCAAATCTTGGACAGCAGGGTAAAGAATTTT  | 1373741 |
| Query | 2581    | TAATCAGCTTCTAGAAAATGAGCAACAGCAAGAATTAGAAGTATTCGAAAAGTTTGATAA | 2640    |
|       |         |                                                              |         |
| Sbjct | 1373742 | TAATCAGCTTCTAGAAAATGAGCAACAGCAAGAATTAGAAGTATTCGAAAAGTTTGATAA | 1373801 |
| Query | 2641    | AGAATCATTAGCTTTTGAGAACTTACCGATAATAATCAAACACAGCTAGTAAGCCTACA  | 2700    |
|       |         |                                                              |         |
| Sbjct | 1373802 | AGAATCATTAGCTTTTGAGAACTTACCGATAATAATCAAACACAGCTAGTAAGCCTACA  | 1373861 |
| Query | 2701    | GCGAAACTTACTTGAAGTAGATTGCCAAAACCATGCCAAGCAAAAAGATTTAAGTATTAG | 2760    |

|       |         |                                                                |         |
|-------|---------|----------------------------------------------------------------|---------|
|       |         |                                                                |         |
| Sbjct | 1373862 | GCGAAACTTACTTGAAGTAGATTGCCAAAACCATGCCAAGCAAAAAGATTTAAGTATTAG   | 1373921 |
| Query | 2761    | TATTAAGCTCTTGTTCATAGTCCACTTAGAGAGGTGCAGATTTTGCATGATAAGCTTTTGGG | 2820    |
|       |         |                                                                |         |
| Sbjct | 1373922 | TATTAAGCTCTTGTTCATAGTCCACTTAGAGAGGTGCAGATTTTGCATGATAAGCTTTTGGG | 1373981 |
| Query | 2821    | TATGATCAAAGCAGATCCAAATATCAAGCCTAGAGATATCCTAGTGATGTGCCCAAATAT   | 2880    |
|       |         |                                                                |         |
| Sbjct | 1373982 | TATGATCAAAGCAGATCCAAATATCAAGCCTAGAGATATCCTAGTGATGTGCCCAAATAT   | 1374041 |
| Query | 2881    | TGAAGATTATTCACCATATATTGATAGTGTTTCTCAAGATATCCAAGTATAAAAACT      | 2940    |
|       |         |                                                                |         |
| Sbjct | 1374042 | TGAAGATTATTCACCATATATTGATAGTGTTTCTCAAGATATCCAAGTATAAAAACT      | 1374101 |
| Query | 2941    | GCCATGCTCAATCGCAGATAGAAGCTACTTGATTCAGAGCCTTTAGCTGCTAGTTTAT     | 3000    |
|       |         |                                                                |         |
| Sbjct | 1374102 | GCCATGCTCAATCGCAGATAGAAGCTACTTGATTCAGAGCCTTTAGCTGCTAGTTTAT     | 1374161 |
| Query | 3001    | TGAGCTTTTGCAGTTGCCTGAGAGTAATTTTGAAGTTAATAAAATCTTGATTATCTAGC    | 3060    |
|       |         |                                                                |         |
| Sbjct | 1374162 | TGAGCTTTTGCAGTTGCCTGAGAGTAATTTTGAAGTTAATAAAATCTTGATTATCTAGC    | 1374221 |
| Query | 3061    | TGTACCGGCTATCCAACAGAAGTTTAAGATCACAGATGAACAATTAGAGGCTATTCGCTA   | 3120    |
|       |         |                                                                |         |
| Sbjct | 1374222 | TGTACCGGCTATCCAACAGAAGTTTAAGATCACAGATGAACAATTAGAGGCTATTCGCTA   | 1374281 |
| Query | 3121    | TTGGTTAAAAGAGTCATGTATTCATCATAGCAATAATGATCAGACATTCTCATGGAGCTG   | 3180    |
|       |         |                                                                |         |
| Sbjct | 1374282 | TTGGTTAAAAGAGTCATGTATTCATCATAGCAATAATGATCAGACATTCTCATGGAGCTG   | 1374341 |
| Query | 3181    | GGGACTAAGAAGATTAATGCTTGGGTTTAGCTATAGTGATAGTAGTTACATCATTGATGA   | 3240    |
|       |         |                                                                |         |
| Sbjct | 1374342 | GGGACTAAGAAGATTAATGCTTGGGTTTAGCTATAGTGATAGTAGTTACATCATTGATGA   | 1374401 |
| Query | 3241    | TAAATTAATGACGGTACCAGTTATTGAAGGAAGTGAGATCGCTGAAGTTGGTGGTTTGTG   | 3300    |
|       |         |                                                                |         |
| Sbjct | 1374402 | TAAATTAATGACGGTACCAGTTATTGAAGGAAGTGAGATCGCTGAAGTTGGTGGTTTGTG   | 1374461 |
| Query | 3301    | TGAGTTATTAGAGCTACTTGAAAGATATTCTCAAAATTTGCTTAAACCAAGAAGCTTGC    | 3360    |
|       |         |                                                                |         |
| Sbjct | 1374462 | TGAGTTATTAGAGCTACTTGAAAGATATTCTCAAAATTTGCTTAAACCAAGAAGCTTGC    | 1374521 |
| Query | 3361    | AAATTGGCAAGTTTATCTTTTAGAAATGTTTGATGATGTCTTTGATGTCACCTAATGATGA  | 3420    |
|       |         |                                                                |         |
| Sbjct | 1374522 | AAATTGGCAAGTTTATCTTTTAGAAATGTTTGATGATGTCTTTGATGTCACCTAATGATGA  | 1374581 |
| Query | 3421    | GCAATATATTGCTaaaaaaTCAAAGATATAATCGCAAAACAGTCACTACCGCTAAAAA     | 3480    |

|       |         |                                                              |         |
|-------|---------|--------------------------------------------------------------|---------|
|       |         |                                                              |         |
| Sbjct | 1374582 | GCAATATATTGCTAAAAAATCAAGATATAATCGCAAAACAGTCACTACCGCTAAAAA    | 1374641 |
| Query | 3481    | TATATTGTTAGATCAAGAAATTGATTTATATACAATTAGATATTGTTTAATTTCTCAATT | 3540    |
|       |         |                                                              |         |
| Sbjct | 1374642 | TATATTGTTAGATCAAGAAATTGATTTATATACAATTAGATATTGTTTAATTTCTCAATT | 1374701 |
| Query | 3541    | ATCAGAGCCAATTATTAATAACCATTTTTTAAATGGTAAGGTGACTTTTTGTTCGATGAC | 3600    |
|       |         |                                                              |         |
| Sbjct | 1374702 | ATCAGAGCCAATTATTAATAACCATTTTTTAAATGGTAAGGTGACTTTTTGTTCGATGAC | 1374761 |
| Query | 3601    | GCCGATGCGTAGTGTACCATTTAGAGTTATAGCTATGCTTGGATTAAATAATGGTAAGTT | 3660    |
|       |         |                                                              |         |
| Sbjct | 1374762 | GCCGATGCGTAGTGTACCATTTAGAGTTATAGCTATGCTTGGATTAAATAATGGTAAGTT | 1374821 |
| Query | 3661    | CCCACACCAAGAATCTGCAATTAGCTTTGATCTGATAGCAAGGCTTGGTAGaaaaaaAGG | 3720    |
|       |         |                                                              |         |
| Sbjct | 1374822 | CCCACACCAAGAATCTGCAATTAGCTTTGATCTGATAGCAAGGCTTGGTAGAAAAAAGG  | 1374881 |
| Query | 3721    | TGATAGAACCAAACGCGATGATGATAGATATTTGTTTTAGAGGCTATTTATCTGCTAG   | 3780    |
|       |         |                                                              |         |
| Sbjct | 1374882 | TGATAGAACCAAACGCGATGATGATAGATATTTGTTTTAGAGGCTATTTATCTGCTAG   | 1374941 |
| Query | 3781    | AGATTATTTGTATATAAGCTATATAGGTAGAAGTGTTAAGACTAATGTTGAGCAACAGCC | 3840    |
|       |         |                                                              |         |
| Sbjct | 1374942 | AGATTATTTGTATATAAGCTATATAGGTAGAAGTGTTAAGACTAATGTTGAGCAACAGCC | 1375001 |
| Query | 3841    | AAGTTTGATACTTAAAGAGTTGACTAGCTATTTGAATTTGAACTACGATTGGGGAAAGGA | 3900    |
|       |         |                                                              |         |
| Sbjct | 1375002 | AAGTTTGATACTTAAAGAGTTGACTAGCTATTTGAATTTGAACTACGATTGGGGAAAGGA | 1375061 |
| Query | 3901    | GGATATAAAAGAGTATCCATTGCATGCTTTTAGTTCTAAATGTTATTCTGACAGTTATAG | 3960    |
|       |         |                                                              |         |
| Sbjct | 1375062 | GGATATAAAAGAGTATCCATTGCATGCTTTTAGTTCTAAATGTTATTCTGACAGTTATAG | 1375121 |
| Query | 3961    | AAGCTATGATAAAGCTTGGTTGAAGTTGTTACAGTCTGAGCCAAGGGGCTTTTATGATTC | 4020    |
|       |         |                                                              |         |
| Sbjct | 1375122 | AAGCTATGATAAAGCTTGGTTGAAGTTGTTACAGTCTGAGCCAAGGGGCTTTTATGATTC | 1375181 |
| Query | 4021    | GGCTTCATTAAGTAACTGTGCTAATTTACCCAAAAATCTAAGTATTTCAAACCTTGTTAA | 4080    |
|       |         |                                                              |         |
| Sbjct | 1375182 | GGCTTCATTAAGTAACTGTGCTAATTTACCCAAAAATCTAAGTATTTCAAACCTTGTTAA | 1375241 |
| Query | 4081    | AGTTTTTGATGACCCTATTAAGGCTTATGCAAATTATACTTTAGAGCTGTATTTAGAAGA | 4140    |
|       |         |                                                              |         |
| Sbjct | 1375242 | AGTTTTTGATGACCCTATTAAGGCTTATGCAAATTATACTTTAGAGCTGTATTTAGAAGA | 1375301 |
| Query | 4141    | TGACTTTGAGGAGCTAGAAGATAGTGAACCATTTGATATCAATAGTTTGGATAAGCATAA | 4200    |

|       |         |                                                               |         |
|-------|---------|---------------------------------------------------------------|---------|
|       |         |                                                               |         |
| Sbjct | 1375302 | TGACTTTGAGGAGCTAGAAGATAGTGAACCATTTGATATCAATAGTTTGGATAAGCATAA  | 1375361 |
| Query | 4201    | GCTCAAACAAGCTTTGTTAAAACTTTTGAAGATGAAAAAGACAAAGATTTAACAATAAA   | 4260    |
|       |         |                                                               |         |
| Sbjct | 1375362 | GCTCAAACAAGCTTTGTTAAAACTTTTGAAGATGAAAAAGACAAAGATTTAACAATAAA   | 1375421 |
| Query | 4261    | AACAGCCAAACTAAGTGGCAAGCTTCCGGAGTCAGTACTTACTGATACTGAGATTAAAGA  | 4320    |
|       |         |                                                               |         |
| Sbjct | 1375422 | AACAGCCAAACTAAGTGGCAAGCTTCCGGAGTCAGTACTTACTGATACTGAGATTAAAGA  | 1375481 |
| Query | 4321    | GGAAGTTGAGAATATTCAAAAGCTACTAGACAAAATGAGCTTAGCAAGTTACGAGTCAAA  | 4380    |
|       |         |                                                               |         |
| Sbjct | 1375482 | GGAAGTTGAGAATATTCAAAAGCTACTAGACAAAATGAGCTTAGCAAGTTACGAGTCAAA  | 1375541 |
| Query | 4381    | ATATTTTCATCAAGAGATATTAGGGTATGAGTTAGAAGCTAATTGTTATATTAAAAATAA  | 4440    |
|       |         |                                                               |         |
| Sbjct | 1375542 | ATATTTTCATCAAGAGATATTAGGGTATGAGTTAGAAGCTAATTGTTATATTAAAAATAA  | 1375601 |
| Query | 4441    | TCAAATTATGTTATCTACACCATCTAGTTTGAATATAGGaaaaaaTTTGAATTGTACTT   | 4500    |
|       |         |                                                               |         |
| Sbjct | 1375602 | TCAAATTATGTTATCTACACCATCTAGTTTGAATATAGGAAAAAATTTGAATTGTACTT   | 1375661 |
| Query | 4501    | AATAGCTTTATTAGTAGCATATTCTGAACAAAGAGATATTAGCGCAGTCTATTATGGTAT  | 4560    |
|       |         |                                                               |         |
| Sbjct | 1375662 | AATAGCTTTATTAGTAGCATATTCTGAACAAAGAGATATTAGCGCAGTCTATTATGGTAT  | 1375721 |
| Query | 4561    | AGaaaaaaTCAAGTAGAAGAATTTAGAGTAGAAAAATTTGAATATACAACAGCTAAAGG   | 4620    |
|       |         |                                                               |         |
| Sbjct | 1375722 | AGAAAAAATCAAGTAGAAGAATTTAGAGTAGAAAAATTTGAATATACAACAGCTAAAGG   | 1375781 |
| Query | 4621    | AATATTAGAGCATTATATAAATCAAGCTGAGCAAATAGTAGTTAAGCCTCAACTAGCACA  | 4680    |
|       |         |                                                               |         |
| Sbjct | 1375782 | AATATTAGAGCATTATATAAATCAAGCTGAGCAAATAGTAGTTAAGCCTCAACTAGCACA  | 1375841 |
| Query | 4681    | TTTATCTTTAGCTGAAGCTATTTGTGATTATAAAAAATAATACTGATAAGAAGAAGCAACA | 4740    |
|       |         |                                                               |         |
| Sbjct | 1375842 | TTTATCTTTAGCTGAAGCTATTTGTGATTATAAAAAATAATACTGATAAGAAGAAGCAACA | 1375901 |
| Query | 4741    | GGCTTGGCAAAAAGTAATAAAATCATCACAACATAATTTCAAAGCTCTAGAAGATAATAG  | 4800    |
|       |         |                                                               |         |
| Sbjct | 1375902 | GGCTTGGCAAAAAGTAATAAAATCATCACAACATAATTTCAAAGCTCTAGAAGATAATAG  | 1375961 |
| Query | 4801    | TTATTTCAAGCTATTCTATAATAAGTTTCCAAGTGTAGATGATTTTGAGGGTGAAAAAAT  | 4860    |
|       |         |                                                               |         |
| Sbjct | 1375962 | TTATTTCAAGCTATTCTATAATAAGTTTCCAAGTGTAGATGATTTTGAGGGTGAAAAAAT  | 1376021 |
| Query | 4861    | TTACAAAAAGTTCTTTGAGGTTATTTATGAAAGTCAATCATGAGCATTCTAATATCCCAC  | 4920    |

|       |         |                                                               |         |
|-------|---------|---------------------------------------------------------------|---------|
|       |         |                                                               |         |
| Sbjct | 1376022 | TTACAAAAAGTTCTTTGAGGTTATTTATGAAAGTCAATCATGAGCATTCTAATATCCCAC  | 1376081 |
| Query | 4921    | AGCTATACAAAAATATTTATATTAGCTTTGAGATTGCTCTAGCTGCTTGTATATGTTTTTC | 4980    |
|       |         |                                                               |         |
| Sbjct | 1376082 | AGCTATACAAAAATATTTATATTAGCTTTGAGATTGCTCTAGCTGCTTGTATATGTTTTTC | 1376141 |
| Query | 4981    | TGTTAGGGTTTTATATGTCGAATTTGTTACATCGTGGTCAGTCGATTATTGGAGGCTTTT  | 5040    |
|       |         |                                                               |         |
| Sbjct | 1376142 | TGTTAGGGTTTTATATGTCGAATTTGTTACATCGTGGTCAGTCGATTATTGGAGGCTTTT  | 1376201 |
| Query | 5041    | GGTGTTTGATTACAGTTTCAACAATCTTACAGCTAAGTATTAGAGATTCGTATTTGGCTG  | 5100    |
|       |         |                                                               |         |
| Sbjct | 1376202 | GGTGTTTGATTACAGTTTCAACAATCTTACAGCTAAGTATTAGAGATTCGTATTTGGCTG  | 1376261 |
| Query | 5101    | CTTTTCAAATATTGGTTGGCTCTGTGATAGGAGGGATTACGGCATTTATTTTACATCAG   | 5160    |
|       |         |                                                               |         |
| Sbjct | 1376262 | CTTTTCAAATATTGGTTGGCTCTGTGATAGGAGGGATTACGGCATTTATTTTACATCAG   | 1376321 |
| Query | 5161    | TTTTAGGCTATTACTACTATGTTATGATTTTGGCTGTAGCTATTAGTGTTTTATTACTG   | 5220    |
|       |         |                                                               |         |
| Sbjct | 1376322 | TTTTAGGCTATTACTACTATGTTATGATTTTGGCTGTAGCTATTAGTGTTTTATTACTG   | 1376381 |
| Query | 5221    | CAAGTATAGGGTTAGAAAAATGCGGTTAAATGAGTAGCGCAAATGCTGGAGTAATTGTCTG | 5280    |
|       |         |                                                               |         |
| Sbjct | 1376382 | CAAGTATAGGGTTAGAAAAATGCGGTTAAATGAGTAGCGCAAATGCTGGAGTAATTGTCTG | 1376441 |
| Query | 5281    | CATTAGGTCTGTATCAGCCTAGTTATTCACCTTTTCTAAATACAGGTTTACGCTTGATAG  | 5340    |
|       |         |                                                               |         |
| Sbjct | 1376442 | CATTAGGTCTGTATCAGCCTAGTTATTCACCTTTTCTAAATACAGGTTTACGCTTGATAG  | 1376501 |
| Query | 5341    | AGACTTTTAGTGGTACTGCAATAGCtttatatttttatatttattagtaggatttttaGGA | 5400    |
|       |         |                                                               |         |
| Sbjct | 1376502 | AGACTTTTAGTGGTACTGCAATAGCTTTATTTTTTATATTTATTAGTAGGATTTTAGGA   | 1376561 |
| Query | 5401    | TAAGAACAGACGACTAATATATAGATTTATAGGATTAAATGAGTAATAATGAAAAACCTA  | 5460    |
|       |         |                                                               |         |
| Sbjct | 1376562 | TAAGAACAGACGACTAATATATAGATTTATAGGATTAAATGAGTAATAATGAAAAACCTA  | 1376621 |
| Query | 5461    | AACGCAAAAAGAATAACCCTGCAAGGTCGCCATATTATTAAGGCAAGTGTTAAGCTCGAT  | 5520    |
|       |         |                                                               |         |
| Sbjct | 1376622 | AACGCAAAAAGAATAACCCTGCAAGGTCGCCATATTATTAAGGCAAGTGTTAAGCTCGAT  | 1376681 |
| Query | 5521    | GCAATACAGTATGACAGAATCTAAAAAGATGAGAAACATATGAACATACTACAGCGAATA  | 5580    |
|       |         |                                                               |         |
| Sbjct | 1376682 | GCAATACAGTATGACAGAATCTAAAAAGATGAGAAACATATGAACATACTACAGCGAATA  | 1376741 |
| Query | 5581    | CAAAATGGTGAAGATAGTTACACGCAATTTAAACAAGATATAAATAATGCTGATAGTCTT  | 5640    |



|       |         |                                                               |         |
|-------|---------|---------------------------------------------------------------|---------|
|       |         |                                                               |         |
| Sbjct | 1376742 | CAAAATGGTGAAGATAGTTACACGCAATTAAACAAGATATAAATAATGCTGATAGTCTT   | 1376801 |
| Query | 5641    | GCACAAGAGCTTGTGCTTTTTCAAATGCTAATGGCGGTATTTTAATCATTGGTGTGCT    | 5700    |
|       |         |                                                               |         |
| Sbjct | 1376802 | GCACAAGAGCTTGTGCTTTTTCAAATGCTAATGGCGGTATTTTAATCATTGGTGTGCT    | 1376861 |
| Query | 5701    | GATGATGGTAAAATTATCGGATTATCAAAAGATGATATTCATAGGATAAATCAGCTTATA  | 5760    |
|       |         |                                                               |         |
| Sbjct | 1376862 | GATGATGGTAAAATTATCGGATTATCAAAAGATGATATTCATAGGATAAATCAGCTTATA  | 1376921 |
| Query | 5761    | AGTAATGTTTGCAGTACAAATATAAAACCACCAATAAGCGTACTAACAAGATAGAGAAT   | 5820    |
|       |         |                                                               |         |
| Sbjct | 1376922 | AGTAATGTTTGCAGTACAAATATAAAACCACCAATAAGCGTACTAACAAGATAGAGAAT   | 1376981 |
| Query | 5821    | ATAGATGATAAAGAAATACTTATAATAGAAATAAACAATGGAGTAAATAAACCATATAGT  | 5880    |
|       |         |                                                               |         |
| Sbjct | 1376982 | ATAGATGATAAAGAAATACTTATAATAGAAATAAACAATGGAGTAAATAAACCATATAGT  | 1377041 |
| Query | 5881    | ACTAACAAGGAGTATATTTGACAAAAGTTGGTAGTGATAAAAGAAAAATGTCTCAAGAA   | 5940    |
|       |         |                                                               |         |
| Sbjct | 1377042 | ACTAACAAGGAGTATATTTGACAAAAGTTGGTAGTGATAAAAGAAAAATGTCTCAAGAA   | 1377101 |
| Query | 5941    | GAGCTAGGTAGACTTTTGTAGACAGGCTCCAAAAGTATCCTGATGAAGAAGTGCTATAT   | 6000    |
|       |         |                                                               |         |
| Sbjct | 1377102 | GAGCTAGGTAGACTTTTGTAGACAGGCTCCAAAAGTATCCTGATGAAGAAGTGCTATAT   | 1377161 |
| Query | 6001    | AAAACATCGCTAGAAAACCTTTGATGTTTCAAAGTTTAGAAAGTTTCTAAAAACAGATAAC | 6060    |
|       |         |                                                               |         |
| Sbjct | 1377162 | AAAACATCGCTAGAAAACCTTTGATGTTTCAAAGTTTAGAAAGTTTCTAAAAACAGATAAC | 1377221 |
| Query | 6061    | TATACTACATTTTCAAACCTAGAGAATGGTAGTCTAGATTATCAACTATTCTAGAAAAT   | 6120    |
|       |         |                                                               |         |
| Sbjct | 1377222 | TATACTACATTTTCAAACCTAGAGAATGGTAGTCTAGATTATCAACTATTCTAGAAAAT   | 1377281 |
| Query | 6121    | AAAGATTTAGCAAAAGATGGCAAACCTTAAGTCCGGTAATCTTATATTTGGAGAAGAG    | 6180    |
|       |         |                                                               |         |
| Sbjct | 1377282 | AAAGATTTAGCAAAAGATGGCAAACCTTAAGTCCGGTAATCTTATATTTGGAGAAGAG    | 1377341 |
| Query | 6181    | CCACAGCGGTTTGTCCAAGCTTTTATATAGACTGCTGTTATTTGATGGTAATGATATT    | 6240    |
|       |         |                                                               |         |
| Sbjct | 1377342 | CCACAGCGGTTTGTCCAAGCTTTTATATAGACTGCTGTTATTTGATGGTAATGATATT    | 1377401 |
| Query | 6241    | TCTGTATCGAAATTTATATCTAAAAAGTTATCAAAGGAACATTTCTGAACTATATGAA    | 6300    |
|       |         |                                                               |         |
| Sbjct | 1377402 | TCTGTATCGAAATTTATATCTAAAAAGTTATCAAAGGAACATTTCTGAACTATATGAA    | 1377461 |
| Query | 6301    | GATACCATGAGATTTTGTCTTAGTCAGTTAAAAAGTTATCAAATAGATTTAGATTTAAC   | 6360    |

|       |         |                                                               |         |
|-------|---------|---------------------------------------------------------------|---------|
|       |         |                                                               |         |
| Sbjct | 1377462 | GATACCATGAGATTTTGTGCTTAGTCAGTTAAAAAGTTATCAAATAGATTTAGATTTTAAC | 1377521 |
| Query | 6361    | TCAAACCCACAATTAGAGGTAAATGAATCTGCACCTAACAGAGATAGTTGTAAATGCACTT | 6420    |
|       |         |                                                               |         |
| Sbjct | 1377522 | TCAAACCCACAATTAGAGGTAAATGAATCTGCACCTAACAGAGATAGTTGTAAATGCACTT | 1377581 |
| Query | 6421    | GTGCATAGAGACTATTATATAAACTCTTCTATAAAGGTTTTTATATTTTCATAACCGTGTT | 6480    |
|       |         |                                                               |         |
| Sbjct | 1377582 | GTGCATAGAGACTATTATATAAACTCTTCTATAAAGGTTTTTATATTTTCATAACCGTGTT | 1377641 |
| Query | 6481    | GAGATTATTAGCCCTGGTAAATTACCTGACACTTTAACAGTAGATAAGATTAAAAATGGC  | 6540    |
|       |         |                                                               |         |
| Sbjct | 1377642 | GAGATTATTAGCCCTGGTAAATTACCTGACACTTTAACAGTAGATAAGATTAAAAATGGC  | 1377701 |
| Query | 6541    | ATAGCAATTCAGCGAAACCCTATCTTAGCCTCAATATGCAAAACATTATTACCTTATACA  | 6600    |
|       |         |                                                               |         |
| Sbjct | 1377702 | ATAGCAATTCAGCGAAACCCTATCTTAGCCTCAATATGCAAAACATTATTACCTTATACA  | 1377761 |
| Query | 6601    | GGTTATGGTAGTGGAATCAAAAGAGCTATTGAGCTAATTCCTAATATTGAATTTATAAAT  | 6660    |
|       |         |                                                               |         |
| Sbjct | 1377762 | GGTTATGGTAGTGGAATCAAAAGAGCTATTGAGCTAATTCCTAATATTGAATTTATAAAT  | 1377821 |
| Query | 6661    | GATATAGATAGTGAACAGTTTAGATGTATTATAaaaagagatgaaagttcaccaaaagag  | 6720    |
|       |         |                                                               |         |
| Sbjct | 1377822 | GATATAGATAGTGAACAGTTTAGATGTATTATAAAAAGAGATGAAAGTTCACCAAAAGAG  | 1377881 |
| Query | 6721    | caagaaagttcaccaaaagagcaagaaagttcaccaaaagagcaagaaagttcaccaaTA  | 6780    |
|       |         |                                                               |         |
| Sbjct | 1377882 | CAAGAAAGTTCACCAAAAGAGCAAGAAAGTTCACCAAAAGAGCAAGAAAGTTCACCAATA  | 1377941 |
| Query | 6781    | AATATAAGTTATGGTGTGGCAGTTCACCAAAAACAGATAAGCAGATTTTAGAAATGTTT   | 6840    |
|       |         |                                                               |         |
| Sbjct | 1377942 | AATATAAGTTATGGTGTGGCAGTTCACCAAAAACAGATAAGCAGATTTTAGAAATGTTT   | 1378001 |
| Query | 6841    | AGAGAAAACCCAAAAATCACAATCAAGGAAATAGCAGAGAGATTGTCTATCACAGATAGA  | 6900    |
|       |         |                                                               |         |
| Sbjct | 1378002 | AGAGAAAACCCAAAAATCACAATCAAGGAAATAGCAGAGAGATTGTCTATCACAGATAGA  | 1378061 |
| Query | 6901    | GCTGTCAAAAAGCATATAGAAAACTAAAATACCAAGGATTAATTGCTAGAGAAGGAAGC   | 6960    |
|       |         |                                                               |         |
| Sbjct | 1378062 | GCTGTCAAAAAGCATATAGAAAACTAAAATACCAAGGATTAATTGCTAGAGAAGGAAGC   | 1378121 |
| Query | 6961    | CCTCGTAACGGCTATTGGAGAGTTATATAAATTGCAATGATGAAAGTTTAAATAGACTT   | 7020    |
|       |         |                                                               |         |
| Sbjct | 1378122 | CCTCGTAACGGCTATTGGAGAGTTATATAAATTGCAATGATGAAAGTTTAAATAGACTT   | 1378181 |
| Query | 7021    | TGAACTATCTAGATTTTATGGGTATATAGAAGACACAGATTATGGACAACCTAAACGCAA  | 7080    |

|       |         |                                                               |         |
|-------|---------|---------------------------------------------------------------|---------|
|       |         |                                                               |         |
| Sbjct | 1378182 | TGAACTATCTAGATTTTATGGGTATATAGAAGACACAGATTATGGACAACCTAAACGCAA  | 1378241 |
| Query | 7081    | ACATAATAACTCTACAAGGTCGCCATATTATCGAGGCAAGTGCTGGTACTGGTAAGACTT  | 7140    |
|       |         |                                                               |         |
| Sbjct | 1378242 | ACATAATAACTCTACAAGGTCGCCATATTATCGAGGCAAGTGCTGGTACTGGTAAGACTT  | 1378301 |
| Query | 7141    | TTAATATTACTAAGTTGTATATCCGACTTTTGCTAGaaaaaaTTATTGCCAAGTAATA    | 7200    |
|       |         |                                                               |         |
| Sbjct | 1378302 | TTAATATTACTAAGTTGTATATCCGACTTTTGCTAGAAAAAAATTATTGCCAAGTAATA   | 1378361 |
| Query | 7201    | TCCTTGTAATGACCTTTACCAAAGATGCAACCCAAGAGATTATTGGTAGAGTTGAAAAAG  | 7260    |
|       |         |                                                               |         |
| Sbjct | 1378362 | TCCTTGTAATGACCTTTACCAAAGATGCAACCCAAGAGATTATTGGTAGAGTTGAAAAAG  | 1378421 |
| Query | 7261    | AGATTCGAGATGTATTAGCAAGTTATACAGATGAGAAAAAGGAGTCTGACAAAGAAACT   | 7320    |
|       |         |                                                               |         |
| Sbjct | 1378422 | AGATTCGAGATGTATTAGCAAGTTATACAGATGAGAAAAAGGAGTCTGACAAAGAAACT   | 1378481 |
| Query | 7321    | ACAAACATCTAAAAAGATCATTACTTGAGATAGATGAGGCAGCTATATTTACTATCCATG  | 7380    |
|       |         |                                                               |         |
| Sbjct | 1378482 | ACAAACATCTAAAAAGATCATTACTTGAGATAGATGAGGCAGCTATATTTACTATCCATG  | 1378541 |
| Query | 7381    | GTTTTTGTAaaaaAGTCTTAAGTGAGCAAGCCTTTGCTAGCGGTATCGAGATGGATGTCT  | 7440    |
|       |         |                                                               |         |
| Sbjct | 1378542 | GTTTTTGTAaaaaAGTCTTAAGTGAGCAAGCCTTTGCTAGCGGTATCGAGATGGATGTCT  | 1378601 |
| Query | 7441    | CTATGGAGGTTGATACTTCAGATATTTTCAAAGGTTGTAGAGGATTTTTCAGAAAAC     | 7500    |
|       |         |                                                               |         |
| Sbjct | 1378602 | CTATGGAGGTTGATACTTCAGATATTTTCAAAGGTTGTAGAGGATTTTTCAGAAAAC     | 1378661 |
| Query | 7501    | ATATCAATAAAAGCGAAACTAATTTTGGATATTTACAAATATATAAATTACATACTCCAG  | 7560    |
|       |         |                                                               |         |
| Sbjct | 1378662 | ATATCAATAAAAGCGAAACTAATTTTGGATATTTACAAATATATAAATTACATACTCCAG  | 1378721 |
| Query | 7561    | AGAAATTTTATAGATGACCTTGAGAATATTATTAGGTCTAATTATGAGATTTTAACAAAGC | 7620    |
|       |         |                                                               |         |
| Sbjct | 1378722 | AGAAATTTTATAGATGACCTTGAGAATATTATTAGGTCTAATTATGAGATTTTAACAAAGC | 1378781 |
| Query | 7621    | AAGCTATAAGCTTAGACGAATTTAAGATACTCAAAAAACAACAGTTAGAATTATTTATTA  | 7680    |
|       |         |                                                               |         |
| Sbjct | 1378782 | AAGCTATAAGCTTAGACGAATTTAAGATACTCAAAAAACAACAGTTAGAATTATTTATTA  | 1378841 |
| Query | 7681    | ATAATCACGATATCGTAGATGATTCTTATATAAATTAGGAAAAAGTGAGCCACAGGGCA   | 7740    |
|       |         |                                                               |         |
| Sbjct | 1378842 | ATAATCACGATATCGTAGATGATTCTTATATAAATTAGGAAAAAGTGAGCCACAGGGCA   | 1378901 |
| Query | 7741    | AGAGAGTAGATGAGTATCATAGGGTTTTAGAATGGTTGAAATTAGATAATCAAACACTAT  | 7800    |

|       |         |                                                               |         |
|-------|---------|---------------------------------------------------------------|---------|
|       |         |                                                               |         |
| Sbjct | 1378902 | AGAGAGTAGATGAGTATCATAGGGTTTTAGAAATGGTTGAAATTAGATAATCAAACACTAT | 1378961 |
| Query | 7801    | TCCCAGAGAATATTCTATAATTACAGATGGCAGAAAGATAAGTGCAAACTAATAAAAC    | 7860    |
|       |         |                                                               |         |
| Sbjct | 1378962 | TCCCAGAGAATATTCTATAATTACAGATGGCAGAAAGATAAGTGCAAACTAATAAAAC    | 1379021 |
| Query | 7861    | CAATTTTTATTGGCGTAAAGAATTAAGAGACCTGCAACAAGAAATAAAACAAGCACAAG   | 7920    |
|       |         |                                                               |         |
| Sbjct | 1379022 | CAATTTTTATTGGCGTAAAGAATTAAGAGACCTGCAACAAGAAATAAAACAAGCACAAG   | 1379081 |
| Query | 7921    | CAGCACAATTTATCAGAAAAGCATGCTTGCAAATCCGCCAAGATTTGCAAAGGCAAAAG   | 7980    |
|       |         |                                                               |         |
| Sbjct | 1379082 | CAGCACAATTTATCAGAAAAGCATGCTTGCAAATCCGCCAAGATTTGCAAAGGCAAAAG   | 1379141 |
| Query | 7981    | ATCAAAGGGTGTTTTAGACTTTGATGATTTGATTACCAAGCTTTGCCAAGTGTCAAA     | 8040    |
|       |         |                                                               |         |
| Sbjct | 1379142 | ATCAAAGGGTGTTTTAGACTTTGATGATTTGATTACCAAGCTTTGCCAAGTGTCAAA     | 1379201 |
| Query | 8041    | AATCGCCAGAGTTAGTCAAACTTTGCAAAAACAATATCCAGTTGCTCTTATAGATGAGT   | 8100    |
|       |         |                                                               |         |
| Sbjct | 1379202 | AATCGCCAGAGTTAGTCAAACTTTGCAAAAACAATATCCAGTTGCTCTTATAGATGAGT   | 1379261 |
| Query | 8101    | TTCAAGATACTGATGCTGAGCAGTATGAGATATTAGATACTATTTATCCTTTGAAGAATA  | 8160    |
|       |         |                                                               |         |
| Sbjct | 1379262 | TTCAAGATACTGATGCTGAGCAGTATGAGATATTAGATACTATTTATCCTTTGAAGAATA  | 1379321 |
| Query | 8161    | GTAGTAGTCATTCCCACAAAGGTAAGAATCTCCTTACCAATGGATTAAATTTAAAAGATA  | 8220    |
|       |         |                                                               |         |
| Sbjct | 1379322 | GTAGTAGTCATTCCCACAAAGGTAAGAATCTCCTTACCAATGGATTAAATTTAAAAGATA  | 1379381 |
| Query | 8221    | CCCGCTTACGCGAGTATGACAGTAGTTCTGATCAGAACGATAGCAATCTTCTGCTCTTAA  | 8280    |
|       |         |                                                               |         |
| Sbjct | 1379382 | CCCGCTTACGCGAGTATGACAGTAGTTCTGATCAGAACGATAGCAATCTTCTGCTCTTAA  | 1379441 |
| Query | 8281    | TGATAGGCGATCCAAAACAGGCAATTTATGGCTTTAGAGGTGGAGATATCTTCACATATC  | 8340    |
|       |         |                                                               |         |
| Sbjct | 1379442 | TGATAGGCGATCCAAAACAGGCAATTTATGGCTTTAGAGGTGGAGATATCTTCACATATC  | 1379501 |
| Query | 8341    | TAAAAGCTAAAGATAGTTGTCCAGAAGAAAATCAATGGAGTATGGACACCAACTGGCGTT  | 8400    |
|       |         |                                                               |         |
| Sbjct | 1379502 | TAAAAGCTAAAGATAGTTGTCCAGAAGAAAATCAATGGAGTATGGACACCAACTGGCGTT  | 1379561 |
| Query | 8401    | CAACTGGAGAGATGATAAAAGCTTATAATAGACTTTTTTATAACAAGATTATCAGTCAG   | 8460    |
|       |         |                                                               |         |
| Sbjct | 1379562 | CAACTGGAGAGATGATAAAAGCTTATAATAGACTTTTTTATAACAAGATTATCAGTCAG   | 1379621 |
| Query | 8461    | AAGAAGAGGGGCAAATTGGAACATAATTTTTAGTGATGGTATTGGATATCAGCTTGTC    | 8520    |

|       |         |                                                                |         |
|-------|---------|----------------------------------------------------------------|---------|
|       |         |                                                                |         |
| Sbjct | 1379622 | AAGAAGAGGGGCAAATTGGAACATAATTTTATAGTGATGGTATTGGATATCAGCTTGTCA   | 1379681 |
| Query | 8521    | AAGCTTCACCGGATGCTGATAaaaaaaCAAAAGATTTTGACGATAATTTTAAACCTATTA   | 8580    |
|       |         |                                                                |         |
| Sbjct | 1379682 | AAGCTTCACCGGATGCTGATAAAAAAACAAAGATTTTGACGATAATTTTAAACCTATTA    | 1379741 |
| Query | 8581    | ATTATTTCTATTATGAAGTAGCCGAAGATGATAATAAAAGTGATATTGATACGAATTTAG   | 8640    |
|       |         |                                                                |         |
| Sbjct | 1379742 | ATTATTTCTATTATGAAGTAGCCGAAGATGATAATAAAAGTGATATTGATACGAATTTAG   | 1379801 |
| Query | 8641    | CATTATGGACAGTAAATGAAATTACTAGATTACTAAATACACAAAAAGTAGCAGAAAATG   | 8700    |
|       |         |                                                                |         |
| Sbjct | 1379802 | CATTATGGACAGTAAATGAAATTACTAGATTACTAAATACACAAAAAGTAGCAGAAAATG   | 1379861 |
| Query | 8701    | ATATAGCTATTTTGGTAGAAAATGGCAAACAGGCAAAGATTATCCAACAAGCTTTGCAAG   | 8760    |
|       |         |                                                                |         |
| Sbjct | 1379862 | ATATAGCTATTTTGGTAGAAAATGGCAAACAGGCAAAGATTATCCAACAAGCTTTGCAAG   | 1379921 |
| Query | 8761    | CTAAAAATCTAAGCTCAGTATACCTAAGCCAGCGCGATAATGTCTATCAGCTCAAGAGG    | 8820    |
|       |         |                                                                |         |
| Sbjct | 1379922 | CTAAAAATCTAAGCTCAGTATACCTAAGCCAGCGCGATAATGTCTATCAGCTCAAGAGG    | 1379981 |
| Query | 8821    | CTAAAGAGATCTTAGCTCTTATGGAGGGTATAAATGATCTTGAAAAATAATCTATGTTGA   | 8880    |
|       |         |                                                                |         |
| Sbjct | 1379982 | CTAAAGAGATCTTAGCTCTTATGGAGGGTATAAATGATCTTGAAAAATAATCTATGTTGA   | 1380041 |
| Query | 8881    | AAAGGGCATTATCGACTAGTTTACTCGGTGGTAGAGCTGATAAGTTTATTAGCTATATTG   | 8940    |
|       |         |                                                                |         |
| Sbjct | 1380042 | AAAGGGCATTATCGACTAGTTTACTCGGTGGTAGAGCTGATAAGTTTATTAGCTATATTG   | 1380101 |
| Query | 8941    | ATGAAAATGATGTCTCAGCGTGGGATGATGAGATAGAAAAGCCAAATCTCTAAGGCAAC    | 9000    |
|       |         |                                                                |         |
| Sbjct | 1380102 | ATGAAAATGATGTCTCAGCGTGGGATGATGAGATAGAAAAGCCAAATCTCTAAGGCAAC    | 1380161 |
| Query | 9001    | AATGGCATAAATATGGATTTATGGCATTATTTATGCAGATTATACATGAGAATTTCACTC   | 9060    |
|       |         |                                                                |         |
| Sbjct | 1380162 | AATGGCATAAATATGGATTTATGGCATTATTTATGCAGATTATACATGAGAATTTCACTC   | 1380221 |
| Query | 9061    | AAAAAGCAGATTCAAAGAGCGTATTATTACAAATATTCTTCATTTAGCAGAACTTATTA    | 9120    |
|       |         |                                                                |         |
| Sbjct | 1380222 | AAAAAGCAGATTCAAAGAGCGTATTATTACAAATATTCTTCATTTAGCAGAACTTATTA    | 1380281 |
| Query | 9121    | AAGTGGCTGAGAATAAATATAAACACCCTAATCAACTCATTAATGGTATCGCCACCAAC    | 9180    |
|       |         |                                                                |         |
| Sbjct | 1380282 | AAGTGGCTGAGAATAAATATAAACACCCTAATCAACTCATTAATGGTATCGCCACCAAC    | 1380341 |
| Query | 9181    | TCAACAATACAGCTACAAGTGAGGGTGAACCTTAGATTAGAAAGTGATGACAACCTTGATTA | 9240    |

|       |         |                                                                |         |
|-------|---------|----------------------------------------------------------------|---------|
|       |         |                                                                |         |
| Sbjct | 1380342 | TCAACAATACAGCTACAAGTGAGGGTGAACCTTAGATTAGAAAGTGATGACAACCTTGATTA | 1380401 |
| Query | 9241    | AGATAATTACAATCCATGGATCAAAAGGACTTGAGTATTCAGTTGTGTTTATCCCGTTTG   | 9300    |
|       |         |                                                                |         |
| Sbjct | 1380402 | AGATAATTACAATCCATGGATCAAAAGGACTTGAGTATTCAGTTGTGTTTATCCCGTTTG   | 1380461 |
| Query | 9301    | CTTGCTATGCAAGCACAAAGAAGTTTGAGACAAGTAATTTTACTAAATATTATGATGGTG   | 9360    |
|       |         |                                                                |         |
| Sbjct | 1380462 | CTTGCTATGCAAGCACAAAGAAGTTTGAGACAAGTAATTTTACTAAATATTATGATGGTG   | 1380521 |
| Query | 9361    | ACCTAAACAAACTGTCTACAAAATTGGCAAAGATGATAGTGTGAAACAGCAAGCTGATA    | 9420    |
|       |         |                                                                |         |
| Sbjct | 1380522 | ACCTAAACAAACTGTCTACAAAATTGGCAAAGATGATAGTGTGAAACAGCAAGCTGATA    | 1380581 |
| Query | 9421    | AAGAGGTTATAGAAGAATTAATGCGTCTATTTTATGTAGCTGTTACGCGTGCAGAGCATA   | 9480    |
|       |         |                                                                |         |
| Sbjct | 1380582 | AAGAGGTTATAGAAGAATTAATGCGTCTATTTTATGTAGCTGTTACGCGTGCAGAGCATA   | 1380641 |
| Query | 9481    | GATGTTATATTGGGGTTGCAAAATATAATAATAGCGAAAAGTCACCATTAGCAAGATTCT   | 9540    |
|       |         |                                                                |         |
| Sbjct | 1380642 | GATGTTATATTGGGGTTGCAAAATATAATAATAGCGAAAAGTCACCATTAGCAAGATTCT   | 1380701 |
| Query | 9541    | TAGGTTATCAAAAAGATGATGATTGGTTAGAGAAGATCCAAAGCATAACAGCAAATCCTG   | 9600    |
|       |         |                                                                |         |
| Sbjct | 1380702 | TAGGTTATCAAAAAGATGATGATTGGTTAGAGAAGATCCAAAGCATAACAGCAAATCCTG   | 1380761 |
| Query | 9601    | CTAATCAAAGTCTACTGATAAATATTGCAGATATGCGGGAATTTAGTTTAAAAAATTTAT   | 9660    |
|       |         |                                                                |         |
| Sbjct | 1380762 | CTAATCAAAGTCTACTGATAAATATTGCAGATATGCGGGAATTTAGTTTAAAAAATTTAT   | 1380821 |
| Query | 9661    | CTAGCAAAGATAAAAAATCTGATTATGATACTCTCAAAGCAAATTATATTAGTAACTAG    | 9720    |
|       |         |                                                                |         |
| Sbjct | 1380822 | CTAGCAAAGATAAAAAATCTGATTATGATACTCTCAAAGCAAATTATATTAGTAACTAG    | 1380881 |
| Query | 9721    | AAAATGATAGTTGGGAGATGTTATCTTTCTCAAAAATATCAAAGTCAAAGTTCAAAATA    | 9780    |
|       |         |                                                                |         |
| Sbjct | 1380882 | AAAATGATAGTTGGGAGATGTTATCTTTCTCAAAAATATCAAAGTCAAAGTTCAAAATA    | 1380941 |
| Query | 9781    | CTGCATTAGAAAAAGAAATTGACGAGGCAGAAGATGATAAACTCAAGCTTCAGACAGAA    | 9840    |
|       |         |                                                                |         |
| Sbjct | 1380942 | CTGCATTAGAAAAAGAAATTGACGAGGCAGAAGATGATAAACTCAAGCTTCAGACAGAA    | 1381001 |
| Query | 9841    | AGCTAGCATTTAGATTTACAGCTTCAAAGGAGCTGATATGGGTAATATTCTGCATAATG    | 9900    |
|       |         |                                                                |         |
| Sbjct | 1381002 | AGCTAGCATTTAGATTTACAGCTTCAAAGGAGCTGATATGGGTAATATTCTGCATAATG    | 1381061 |
| Query | 9901    | TTTTAGAGCATACAGATTTTAGTTTAGGTGAGATAGATGGTAATCTTTTACAAGAACAAA   | 9960    |

|       |         |                                                                |         |
|-------|---------|----------------------------------------------------------------|---------|
|       |         |                                                                |         |
| Sbjct | 1381062 | TTT TAGAGCATACAGATTTTAGTTTAGGTGAGATAGATGGTAATCTTTTACAAGAACAAA  | 1381121 |
| Query | 9961    | TGGATAGATATAAAGTAGTTGCTGCAGAAGACTTCGATAATCTTAAATTATGGTTGGAAG   | 10020   |
|       |         |                                                                |         |
| Sbjct | 1381122 | TGGATAGATATAAAGTAGTTGCTGCAGAAGACTTCGATAATCTTAAATTATGGTTGGAAG   | 1381181 |
| Query | 10021   | AATGTTTAGAAGCACATATACCTTATATAGATACCAGTTTTTCTAGCTTAAATGAGAGTA   | 10080   |
|       |         |                                                                |         |
| Sbjct | 1381182 | AATGTTTAGAAGCACATATACCTTATATAGATACCAGTTTTTCTAGCTTAAATGAGAGTA   | 1381241 |
| Query | 10081   | TTCAATATGGTTTATTTTGATATCAAGGATAAAGGCTTTTGCTTAAAACTATCCCAAATT   | 10140   |
|       |         |                                                                |         |
| Sbjct | 1381242 | TTCAATATGGTTTATTTTGATATCAAGGATAAAGGCTTTTGCTTAAAACTATCCCAAATT   | 1381301 |
| Query | 10141   | CGAAAACTCTAAAAGAGGCGGAGTTTATTTTCCTGTAAAAATGAGAATTGTATAAAA      | 10200   |
|       |         |                                                                |         |
| Sbjct | 1381302 | CGAAAACTCTAAAAGAGGCGGAGTTTATTTTCCTGTAAAAATGAGAATTGTATAAAA      | 1381361 |
| Query | 10201   | CAAAATATATTAGAAATCTTGCAAGAGTATAGAGAGCTTACAAAACCTGAAGACATATAGTC | 10260   |
|       |         |                                                                |         |
| Sbjct | 1381362 | CAAAATATATTAGAAATCTTGCAAGAGTATAGAGAGCTTACAAAACCTGAAGACATATAGTC | 1381421 |
| Query | 10261   | ATTCTACGTAGGTGGGAATCTTCCAACCTAACTACCAAGATCTAAGAGATACCCGCCTCC   | 10320   |
|       |         |                                                                |         |
| Sbjct | 1381422 | ATTCTACGTAGGTGGGAATCTTCCAACCTAACTACCAAGATCTAAGAGATACCCGCCTCC   | 1381481 |
| Query | 10321   | GCGAGTATGGCAATTTAACTAATGTTTCGAATCAAAAAATTTTGGTATGCTTCATGGTT    | 10380   |
|       |         |                                                                |         |
| Sbjct | 1381482 | GCGAGTATGGCAATTTAACTAATGTTTCGAATCAAAAAATTTTGGTATGCTTCATGGTT    | 1381541 |
| Query | 10381   | TTATAGATCTTATTTTGGAGTATGAGGGTAAATTTTATGTTGCTGATTATAAATCAAATT   | 10440   |
|       |         |                                                                |         |
| Sbjct | 1381542 | TTATAGATCTTATTTTGGAGTATGAGGGTAAATTTTATGTTGCTGATTATAAATCAAATT   | 1381601 |
| Query | 10441   | ATCTAGGTGATACTTTAGAAGATTATAATCAGCAGGCGATGCAAGAGAAAAATCAAAGTA   | 10500   |
|       |         |                                                                |         |
| Sbjct | 1381602 | ATCTAGGTGATACTTTAGAAGATTATAATCAGCAGGCGATGCAAGAGAAAAATCAAAGTA   | 1381661 |
| Query | 10501   | GCTTTTATGATTTACAGTATCTAATATATAGCGTTGCCTTGGATAAGTACCTGCGACAAA   | 10560   |
|       |         |                                                                |         |
| Sbjct | 1381662 | GCTTTTATGATTTACAGTATCTAATATATAGCGTTGCCTTGGATAAGTACCTGCGACAAA   | 1381721 |
| Query | 10561   | ACATTGAAAGTTATAATTATGAAAAGCATTTTGGCGGAGTATATTATTTTATCTTAGAG    | 10620   |
|       |         |                                                                |         |
| Sbjct | 1381722 | ACATTGAAAGTTATAATTATGAAAAGCATTTTGGCGGAGTATATTATTTTATCTTAGAG    | 1381781 |
| Query | 10621   | GTATGAAAGATGGTTATGGAGTTTATCGAGCTAGACCAAATTTAGAGATTATCAACAAAC   | 10680   |

|       |         |                                                                |         |
|-------|---------|----------------------------------------------------------------|---------|
|       |         |                                                                |         |
| Sbjct | 1381782 | GTATGAAAGATGGTTATGGAGTTTATCGAGCTAGACCAAATTTAGAGATTATCAACAAAC   | 1381841 |
| Query | 10681   | TTGCTAGTTTATTTAATGGAGATGATAATGTATAAACTTTCCATAAAGCTTGTGAGCAA    | 10740   |
|       |         |                                                                |         |
| Sbjct | 1381842 | TTGCTAGTTTATTTAATGGAGATGATAATGTATAAACTTTCCATAAAGCTTGTGAGCAA    | 1381901 |
| Query | 10741   | TTAGCAGATATTAGAGCCATAGATTTTTCTTTGCTAAAGAGGTGTTTGATTTAGTCAAA    | 10800   |
|       |         |                                                                |         |
| Sbjct | 1381902 | TTAGCAGATATTAGAGCCATAGATTTTTCTTTGCTAAAGAGGTGTTTGATTTAGTCAAA    | 1381961 |
| Query | 10801   | AAGACTACTCCGTCTATGACCACCTTATCAAGTGAGTCATATCCACCCTTTCACGGAGCA   | 10860   |
|       |         |                                                                |         |
| Sbjct | 1381962 | AAGACTACTCCGTCTATGACCACCTTATCAAGTGAGTCATATCCACCCTTTCACGGAGCA   | 1382021 |
| Query | 10861   | AAGGGGAATGATTTGGAACAAAAAGTAATGAAATTTTATTTTCATATTTTGATGAAGCTT   | 10920   |
|       |         |                                                                |         |
| Sbjct | 1382022 | AAGGGGAATGATTTGGAACAAAAAGTAATGAAATTTTATTTTCATATTTTGATGAAGCTT   | 1382081 |
| Query | 10921   | ATGCATGTGTATAGTCATGGTCATAGCTGTTTGAAGATAGCAGATATATCAAATAAACT    | 10980   |
|       |         |                                                                |         |
| Sbjct | 1382082 | ATGCATGTGTATAGTCATGGTCATAGCTGTTTGAAGATAGCAGATATATCAAATAAACT    | 1382141 |
| Query | 10981   | ATTTTTCGCTTCAGAGCAAAGTAATCAGAGTGATGCTAAAGTAGGCTTTAAATGCCAAGC   | 11040   |
|       |         |                                                                |         |
| Sbjct | 1382142 | ATTTTTCGCTTCAGAGCAAAGTAATCAGAGTGATGCTAAAGTAGGCTTTAAATGCCAAGC   | 1382201 |
| Query | 11041   | TCTGATAAAATTGCAAGTATTTTAGATAACTTAAATTACGATAATTTACCTATATATTTT   | 11100   |
|       |         |                                                                |         |
| Sbjct | 1382202 | TCTGATAAAATTGCAAGTATTTTAGATAACTTAAATTACGATAATTTACCTATATATTTT   | 1382261 |
| Query | 11101   | GCCAAACAGTATGATTCTTTGTATATTTAAAGATTGTGGAATTATGAGAATGAAATAGCT   | 11160   |
|       |         |                                                                |         |
| Sbjct | 1382262 | GCCAAACAGTATGATTCTTTGTATATTTAAAGATTGTGGAATTATGAGAATGAAATAGCT   | 1382321 |
| Query | 11161   | AACTTTATAAAATTAAAAACAATCCAAAATACTCAAAAAGACAATCGTATTGAAGAAGTT   | 11220   |
|       |         |                                                                |         |
| Sbjct | 1382322 | AACTTTATAAAATTAAAAACAATCCAAAATACTCAAAAAGACAATCGTATTGAAGAAGTT   | 1382381 |
| Query | 11221   | GTAGACAAACTATTTGAACCTGCTGGTGAAATCAACTGGCAAAAACAGGCGGTTATCAAA   | 11280   |
|       |         |                                                                |         |
| Sbjct | 1382382 | GTAGACAAACTATTTGAACCTGCTGGTGAAATCAACTGGCAAAAACAGGCGGTTATCAAA   | 1382441 |
| Query | 11281   | AGTCTAAATTATAATTTTAGTATTATCTCAGGTGGACCTGGTACAGGTAAGACAACACTACA | 11340   |
|       |         |                                                                |         |
| Sbjct | 1382442 | AGTCTAAATTATAATTTTAGTATTATCTCAGGTGGACCTGGTACAGGTAAGACAACACTACA | 1382501 |
| Query | 11341   | GTCGCAAAGCTTTTACTTGCTATACAAATGCTTAATCAAAATCAGCAAAGAATAGCGCTT   | 11400   |



|       |         |                                                                |         |
|-------|---------|----------------------------------------------------------------|---------|
|       |         |                                                                |         |
| Sbjct | 1382502 | GTGCGCAAAGCTTTTACTTGCTATACAAATGCTTAATCAAAATCAGCAAAGAATAGCGCTT  | 1382561 |
| Query | 11401   | TTAGCACCAACTGGTAAGGCTGCTCAGAGAATGACAGAGTCATTAAAAAATACTCTAGCA   | 11460   |
|       |         |                                                                |         |
| Sbjct | 1382562 | TTAGCACCAACTGGTAAGGCTGCTCAGAGAATGACAGAGTCATTAAAAAATACTCTAGCA   | 1382621 |
| Query | 11461   | ACTGTCATTCCGTCAAGCTTGACCACAGAATCTACTATACaaaaaaTGATATCTTTAAA    | 11520   |
|       |         |                                                                |         |
| Sbjct | 1382622 | ACTGTCATTCCGTCAAGCTTGACCACAGAATCTACTATACAAAAAATGATATCTTTAAA    | 1382681 |
| Query | 11521   | CAAGTTCAGGATGAACTTAATAGTGTTGCTCAGTATCTTAATAATCTAGAAGCACAAACT   | 11580   |
|       |         |                                                                |         |
| Sbjct | 1382682 | CAAGTTCAGGATGAACTTAATAGTGTTGCTCAGTATCTTAATAATCTAGAAGCACAAACT   | 1382741 |
| Query | 11581   | ATACATAGATTTTATAGGCTTAAGACCAAACCTCTACTTATGTTAAATATAACCAACAATCT | 11640   |
|       |         |                                                                |         |
| Sbjct | 1382742 | ATACATAGATTTTATAGGCTTAAGACCAAACCTCTACTTATGTTAAATATAACCAACAATCT | 1382801 |
| Query | 11641   | AAAGCTCCATTCGATGTTATTATTGTTGATGAAGCTTCGATGCTTGATATGAATATTTTT   | 11700   |
|       |         |                                                                |         |
| Sbjct | 1382802 | AAAGCTCCATTCGATGTTATTATTGTTGATGAAGCTTCGATGCTTGATATGAATATTTTT   | 1382861 |
| Query | 11701   | ATCAAGTTAATTAGAGCTGTAGCAGATAATACTAAGTTGATATTAATAGGTGATACTAAT   | 11760   |
|       |         |                                                                |         |
| Sbjct | 1382862 | ATCAAGTTAATTAGAGCTGTAGCAGATAATACTAAGTTGATATTAATAGGTGATACTAAT   | 1382921 |
| Query | 11761   | CAGTTACCATCTGTTGAGGCTGGGAGTCTTTTAGCAAACCTTACACATGATAAATATGGT   | 11820   |
|       |         |                                                                |         |
| Sbjct | 1382922 | CAGTTACCATCTGTTGAGGCTGGGAGTCTTTTAGCAAACCTTACACATGATAAATATGGT   | 1382981 |
| Query | 11821   | AGCATTACGCCATATACAACATTACTTATCAAAAACCTATCGTTCACAACAATATATAAAT  | 11880   |
|       |         |                                                                |         |
| Sbjct | 1382982 | AGCATTACGCCATATACAACATTACTTATCAAAAACCTATCGTTCACAACAATATATAAAT  | 1383041 |
| Query | 11881   | AATCTTGAGCCTCAGTCCTAAAAGGCGATGTTAATATTGATAGTCAACAAAATGAAAAT    | 11940   |
|       |         |                                                                |         |
| Sbjct | 1383042 | AATCTTGAGCCTCAGTCCTAAAAGGCGATGTTAATATTGATAGTCAACAAAATGAAAAT    | 1383101 |
| Query | 11941   | ATTAAATTTCATAGTCTAAGAAATTTAGATATTTATTTAAGAGAGTATGCAAAGAGATAT   | 12000   |
|       |         |                                                                |         |
| Sbjct | 1383102 | ATTAAATTTCATAGTCTAAGAAATTTAGATATTTATTTAAGAGAGTATGCAAAGAGATAT   | 1383161 |
| Query | 12001   | TCACAGCTTGAAAAGTGCCGTGACTACAAAGAGGCTCTTACAGAGCTGAATAAATTTAGA   | 12060   |
|       |         |                                                                |         |
| Sbjct | 1383162 | TCACAGCTTGAAAAGTGCCGTGACTACAAAGAGGCTCTTACAGAGCTGAATAAATTTAGA   | 1383221 |
| Query | 12061   | ATACTTGTGGCTAACAAAAACCTAGAAATTTGGTACAGATAAGTTAAATCAGAAAATTGAG  | 12120   |

|       |         |                                                              |         |
|-------|---------|--------------------------------------------------------------|---------|
|       |         |                                                              |         |
| Sbjct | 1383222 | ATACTTGTGGCTAACAAAAACCTAGAAATTGGTACAGATAAGTTAAATCAGAAAATTGAG | 1383281 |
| Query | 12121   | AAGTTTATGTCTAAGCCTATAGATTCTAACTATAAGGGTAAACCAATTATGATAACTCAA | 12180   |
|       |         |                                                              |         |
| Sbjct | 1383282 | AAGTTTATGTCTAAGCCTATAGATTCTAACTATAAGGGTAAACCAATTATGATAACTCAA | 1383341 |
| Query | 12181   | AATAGTTATTCATTAGGGTTATTTAATGGAGATGTAGGGATTATGTGGCCTGATGATACT | 12240   |
|       |         |                                                              |         |
| Sbjct | 1383342 | AATAGTTATTCATTAGGGTTATTTAATGGAGATGTAGGGATTATGTGGCCTGATGATACT | 1383401 |
| Query | 12241   | GGTAAGCTCCGAGCATATTTTGATGGTAAAGATGCTAAGGCATTTAGTCTAAATATGCTA | 12300   |
|       |         |                                                              |         |
| Sbjct | 1383402 | GGTAAGCTCCGAGCATATTTTGATGGTAAAGATGCTAAGGCATTTAGTCTAAATATGCTA | 1383461 |
| Query | 12301   | CCAAAATATGAAAGTGTTTATGCGATGACAATTCATAAACTCAAGGCTCAGAGTTTGAT  | 12360   |
|       |         |                                                              |         |
| Sbjct | 1383462 | CCAAAATATGAAAGTGTTTATGCGATGACAATTCATAAACTCAAGGCTCAGAGTTTGAT  | 1383521 |
| Query | 12361   | GAAATCGTGATTATTCTTCCAGCAGAAGATAATGAAGCGCTAAGTAAACAACCTTTGTAT | 12420   |
|       |         |                                                              |         |
| Sbjct | 1383522 | GAAATCGTGATTATTCTTCCAGCAGAAGATAATGAAGCGCTAAGTAAACAACCTTTGTAT | 1383581 |
| Query | 12421   | ACAGCTATTACTAGAGCAAAATATAAATTAACGATTATATCTGAACAAAGTAGCTTAAGA | 12480   |
|       |         |                                                              |         |
| Sbjct | 1383582 | ACAGCTATTACTAGAGCAAAATATAAATTAACGATTATATCTGAACAAAGTAGCTTAAGA | 1383641 |
| Query | 12481   | GATATTGCTCAGAAAGATATTAATAGAAATTCAAATATCAGTGAATTAGTTAGCTTGAGC | 12540   |
|       |         |                                                              |         |
| Sbjct | 1383642 | GATATTGCTCAGAAAGATATTAATAGAAATTCAAATATCAGTGAATTAGTTAGCTTGAGC | 1383701 |
| Query | 12541   | ACTCAATAACTTAGAAATTACTTATTCATTTGCCAGATTATTCTAAGTCCATGAAGTAAT | 12600   |
|       |         |                                                              |         |
| Sbjct | 1383702 | ACTCAATAACTTAGAAATTACTTATTCATTTGCCAGATTATTCTAAGTCCATGAAGTAAT | 1383761 |
| Query | 12601   | AAATCAGAGATGATTACATCAAAATATTGTTCTTCTCAAAAATATGAGCATAGCCTCCA  | 12660   |
|       |         |                                                              |         |
| Sbjct | 1383762 | AAATCAGAGATGATTACATCAAAATATTGTTCTTCTCAAAAATATGAGCATAGCCTCCA  | 1383821 |
| Query | 12661   | GTTGCTATTAATATTGGTGGTTTATCTATGAAGTTTCTTGAGATATTCGATTAATTATC  | 12720   |
|       |         |                                                              |         |
| Sbjct | 1383822 | GTTGCTATTAATATTGGTGGTTTATCTATGAAGTTTCTTGAGATATTCGATTAATTATC  | 1383881 |
| Query | 12721   | TCTTTTATAGCACCTAATTGACCATATATAAGACCCGATTGGATTTGAGAGATAGTTGTC | 12780   |
|       |         |                                                              |         |
| Sbjct | 1383882 | TCTTTTATAGCACCTAATTGACCATATATAAGACCCGATTGGATTTGAGAGATAGTTGTC | 1383941 |
| Query | 12781   | TTACCTAACGCAGAACTAGGGTGAGAGATAGTTACATTAGATAGTTTTGCAGTTTTTGT  | 12840   |

|       |         |                                                              |         |
|-------|---------|--------------------------------------------------------------|---------|
|       |         |                                                              |         |
| Sbjct | 1383942 | TTACCTAACGCAGAACTAGGGTGAGAGATAGTTACATTAGATAGTTTTGCAGTTTTTTGT | 1384001 |
| Query | 12841   | GATAAGCTCTCCATTGATAGGTTAATTCCTGGTAGGATAGCACCGCCGATATAGGTTTTA | 12900   |
|       |         |                                                              |         |
| Sbjct | 1384002 | GATAAGCTCTCCATTGATAGGTTAATTCCTGGTAGGATAGCACCGCCGATATAGGTTTTA | 1384061 |
| Query | 12901   | TTCTCTGAAATAGCACAAATAGTTGTTGCTGTGCCAAAGTCAACTACAATAATATTCTC  | 12960   |
|       |         |                                                              |         |
| Sbjct | 1384062 | TTCTCTGAAATAGCACAAATAGTTGTTGCTGTGCCAAAGTCAACTACAATAATATTCTC  | 1384121 |
| Query | 12961   | GATGAAAAAGAGAAATAGCTGCAACTGAGTTTGCAACACGATCTGCACCTAAATCTAGA  | 13020   |
|       |         |                                                              |         |
| Sbjct | 1384122 | GATGAAAAAGAGAAATAGCTGCAACTGAGTTTGCAACACGATCTGCACCTAAATCTAGA  | 1384181 |
| Query | 13021   | GGATTTTTGATATCGAGTTTAACTCCTGTTTTTACCCAGGTTTGTAGCTCAAGCGGAGTT | 13080   |
|       |         |                                                              |         |
| Sbjct | 1384182 | GGATTTTTGATATCGAGTTTAACTCCTGTTTTTACCCAGGTTTGTAGCTCAAGCGGAGTT | 1384241 |
| Query | 13081   | ATACCTAAATACTTTTTGCAAGCGGAATTGACAGAATACTCTAGATGAAGAACAACAGAT | 13140   |
|       |         |                                                              |         |
| Sbjct | 1384242 | ATACCTAAATACTTTTTGCAAGCGGAATTGACAGAATACTCTAGATGAAGAACAACAGAT | 1384301 |
| Query | 13141   | GAAAGTACAACTGCTTCAATATCTTCGATATCAAGCTTTTTCTCTCAAAGAACGATAGC  | 13200   |
|       |         |                                                              |         |
| Sbjct | 1384302 | GAAAGTACAACTGCTTCAATATCTTCGATATCAAGCTTTTTCTCTCAAAGAACGATAGC  | 1384361 |
| Query | 13201   | AGAAATATACCTAGCGTATCAGAAGTACACGGAGTAGTAGAAGGGTAGCGAAAGTTATGC | 13260   |
|       |         |                                                              |         |
| Sbjct | 1384362 | AGAAATATACCTAGCGTATCAGAAGTACACGGAGTAGTAGAAGGGTAGCGAAAGTTATGC | 1384421 |
| Query | 13261   | TTAATTTGATCTCCTACAAATACTCCACCAAAAATATGTGAGTTACCAATATCTATACAT | 13320   |
|       |         |                                                              |         |
| Sbjct | 1384422 | TTAATTTGATCTCCTACAAATACTCCACCAAAAATATGTGAGTTACCAATATCTATACAT | 1384481 |
| Query | 13321   | ACTATCAT                                                     | 13328   |
|       |         |                                                              |         |
| Sbjct | 1384482 | ACTATCAT                                                     | 1384489 |
