# Supplementary material for: Development and Properties of Francisella tularensis Subsp. holarctica 15 NIIEG Vaccine Strain without the recD Gene
Source: MDPI journal article supplement (doi:10.3390/vaccines10010108), 2022-01-11
Supplement: s1 [file s1]

Supplementary 3.

Multiple alignment of the amino acid sequence of the RecD proteins of the genus Francisella

| Strain                            | RecD protein accession number |
|-----------------------------------|-------------------------------|
| F. t. subsp. tularensis WY96-3418 | ABO46414.1                    |
| F.t. subsp.holarctica LVS         | AJI59740.1                    |
| F.t.subsp.holarctica FTNF002-00   | ABU61181.1                    |
| F. t.subsp.mediasiatica FSC147    | ACD30618.1                    |
| F.philomiragia ATCC 25017         | AJI55965.1                    |
| F.t.subsp novicida U112           | ABK90231.1                    |
| F.t.subsp. holarctica OSU18       | ABI82625.1                    |
| F.t.subsp.tularensis FSC198       | CAL09409.1                    |
| F.t.subsp.tularensis SCHU S4      | CAG46026.1                    |

|                                        |       |                                                     |     |
|----------------------------------------|-------|-----------------------------------------------------|-----|
|                                        |       | 1                                                   | 50  |
| F. t. subsp. tularensis WY96-3418 RecD | (1)   | -----MYKTFHKACEQLADIRAIDFFFAKEVFDLVKKTTPSMTTLS      |     |
| F.t. subsp.holarctica LVS RecD         | (1)   | -----MYKTFHKACEQLADIRAIDFFFAKEVFDLVKKTTPSMTTLS      |     |
| F.t.subsp.holarctica FTNF002-00 RecD   | (1)   | -----MYKTFHKACEQLADIRAIDFFFAKEVFDLVKKTTPSMTTLS      |     |
| F. t.subsp.mediasiatica FSC147 RecD    | (1)   | MLVYLMEMIMYKTFHKACEQLADIRAIDFFFAKEVFDLVKKTTPSMTTLS  |     |
| F.philomiragia ATCC 25017 RecD         | (1)   | -----MYKTFHKACEQLADIRAIDFFFAKEVFDLVKKTTPSMTTLS      |     |
| F.t.subsp novicida U112 RecD           | (1)   | MLVYLMEMIMYKTFHKACEQLADIRAIDFFFAKEVFDLVKKTTPSMTTLS  |     |
| F.t.subsp. holarctica OSU18 RecD       | (1)   | MLVYLMEMIMYKTFHKACEQLADIRAIDFFFAKEVFDLVKKTTPSMTTLS  |     |
| F.t.subsp.tularensis FSC198 RecD       | (1)   | MLVYLMEMIMYKTFHKACEQLADIRAIDFFFAKEVFDLVKKTTPSMTTLS  |     |
| F.t.subsp.tularensis SCHU S4 RecD      | (1)   | MLVYLMEMIMYKTFHKACEQLADIRAIDFFFAKEVFDLVKKTTPSMTTLS  |     |
| Consensus                              | (1)   | MLVYLMEMIMYKTFHKACEQLADIRAIDFFFAKEVFDLVKKTTPSMTTLS  |     |
|                                        |       | 51                                                  | 100 |
| F. t. subsp. tularensis WY96-3418 RecD | (42)  | SESYPPFHGAGNDLEQKSNELFHILMKLMHVYSHGHSCSKIADISNKT    |     |
| F.t. subsp.holarctica LVS RecD         | (42)  | SESYPPFHGAGNDLEQKSNELFHILMKLMHVYSHGHSCSKIADISNKT    |     |
| F.t.subsp.holarctica FTNF002-00 RecD   | (42)  | SESYPPFHGAGNDLEQKSNELFHILMKLMHVYSHGHSCSKIADISNKT    |     |
| F. t.subsp.mediasiatica FSC147 RecD    | (51)  | SESYPPFHGAGNDLEQKSNELFHILMKLMHVYSHGHSCSKIADISNKT    |     |
| F.philomiragia ATCC 25017 RecD         | (42)  | SESYPPFHGAGNDLEQKSNELFHILMKLMHVYSHGHSCSKIADISNKT    |     |
| F.t.subsp novicida U112 RecD           | (51)  | SESYPPFHGAGNDLEQKSNELFHILMKLMHVYSHGHSCSKIADISNKT    |     |
| F.t.subsp. holarctica OSU18 RecD       | (51)  | SESYPPFHGAGNDLEQKSNELFHILMKLMHVYSHGHSCSKIADISNKT    |     |
| F.t.subsp.tularensis FSC198 RecD       | (51)  | SESYPPFHGAGNDLEQKSNELFHILMKLMHVYSHGHSCSKIADISNKT    |     |
| F.t.subsp.tularensis SCHU S4 RecD      | (51)  | SESYPPFHGAGNDLEQKSNELFHILMKLMHVYSHGHSCSKIADISNKT    |     |
| Consensus                              | (51)  | SESYPPFHGAGNDLEQKSNELFHILMKLMHVYSHGHSCSKIADISNKT    |     |
|                                        |       | 101                                                 | 150 |
| F. t. subsp. tularensis WY96-3418 RecD | (92)  | IFASEQSNQSDAKVGFKMPSSSEKIASILDNINVDNLPIYFAKQYDSLYIK |     |
| F.t. subsp.holarctica LVS RecD         | (92)  | IFASEQSNQSDAKVGFKMPSSSEKIASILDNINVDNLPIYFAKQYDSLYIK |     |
| F.t.subsp.holarctica FTNF002-00 RecD   | (92)  | IFASEQSNQSDAKVGFKMPSSSEKIASILDNINVDNLPIYFAKQYDSLYIK |     |
| F. t.subsp.mediasiatica FSC147 RecD    | (101) | IFASEQSNQSDAKVGFKMPSSSEKIASILDNINVDNLPIYFAKQYDSLYIK |     |
| F.philomiragia ATCC 25017 RecD         | (92)  | IFASEQSNQSDAKVGFKMPSSSEKIASILDNINVDNLPIYFAKQYDSLYIK |     |
| F.t.subsp novicida U112 RecD           | (101) | IFASEQSNQSDAKVGFKMPSSSEKIASILDNINVDNLPIYFAKQYDSLYIK |     |

|                                        |       |                                                     |
|----------------------------------------|-------|-----------------------------------------------------|
| F.t.subsp. holarctica OSU18 RecD       | (101) | IFASEQSNQSDAKVGFKMPSSDKIASILDNLNYDNLPIYFAKQYDSLYIK  |
| F.t.subsp.tularensis FSC198 RecD       | (101) | IFASEQSNQSDAKVGFKMPSSDKIASILDNLNYDNLPIYFAKQYDSLYIK  |
| F.t.subsp.tularensis SCHU S4 RecD      | (101) | IFASEQSNQSDAKVGFKMPSSDKIASILDNLNYDNLPIYFAKQYDSLYIK  |
| Consensus                              | (101) | IFASEQSNQSDAKVGFKMPSSDKIASILDNLNYDNLPIYFAKQYDSLYIK  |
|                                        | 151   | 200                                                 |
| F. t. subsp. tularensis WY96-3418 RecD | (142) | RLWNYENSIANFIKLTQNTQKDNRIEEVVDKLFEPAGEINWQKQAVIK    |
| F.t. subsp.holarctica LVS RecD         | (142) | RLWNYENSIANFIKLTQNTQKDNRIEEVVDKLFEPAGEINWQKQAVIK    |
| F.t.subsp.holarctica FTNF002-00 RecD   | (142) | RLWNYENSIANFIKLTQNTQKDNRIEEVVDKLFEPAGEINWQKQAVIK    |
| F. t.subsp.mediasiatica FSC147 RecD    | (151) | RLWNYENSIANFIKLTQNTQKDNRIEEVVDKLFEPAGEINWQKQAVIK    |
| F.philomiragia ATCC 25017 RecD         | (142) | RLWNYEVENSIANFIKSTIQNTQKDNRIEEVVDKLFEPAGEINWQKQAVIK |
| F.t.subsp novicida U112 RecD           | (151) | RLWNYENSIANFIKLTQNTQKDNRIEEVVDKLFEPAGEINWQKQAVIK    |
| F.t.subsp. holarctica OSU18 RecD       | (151) | RLWNYENSIANFIKLTQNTQKDNRIEEVVDKLFEPAGEINWQKQAVIK    |
| F.t.subsp.tularensis FSC198 RecD       | (151) | RLWNYENSIANFIKLTQNTQKDNRIEEVVDKLFEPAGEINWQKQAVIK    |
| F.t.subsp.tularensis SCHU S4 RecD      | (151) | RLWNYENSIANFIKLTQNTQKDNRIEEVVDKLFEPAGEINWQKQAVIK    |
| Consensus                              | (151) | RLWNYENSIANFIKLTQNTQKDNRIEEVVDKLFEPAGEINWQKQAVIK    |
|                                        | 201   | 250                                                 |
| F. t. subsp. tularensis WY96-3418 RecD | (192) | SLNYNFSIISGGPGTGKTTTVAKLLLAIQMLNQNQRIALLAPTGKAAQR   |
| F.t. subsp.holarctica LVS RecD         | (192) | SLNYNFSIISGGPGTGKTTTVAKLLLAIQMLNQNQRIALLAPTGKAAQR   |
| F.t.subsp.holarctica FTNF002-00 RecD   | (192) | SLNYNFSIISGGPGTGKTTTVAKLLLAIQMLNQNQRIALLAPTGKAAQR   |
| F. t.subsp.mediasiatica FSC147 RecD    | (201) | SLNYNFSIISGGPGTGKTTTVAKLLLAIQMLNQNQRIALLAPTGKAAQR   |
| F.philomiragia ATCC 25017 RecD         | (192) | SLNYNFSIISGGPGTGKTTTVAKLLLAIQMLNQNQRIALLAPTGKAAQR   |
| F.t.subsp novicida U112 RecD           | (201) | SLNYNFSIISGGPGTGKTTTVAKLLLAIQMLNQNQRIALLAPTGKAAQR   |
| F.t.subsp. holarctica OSU18 RecD       | (201) | SLNYNFSIISGGPGTGKTTTVAKLLLAIQMLNQNQRIALLAPTGKAAQR   |
| F.t.subsp.tularensis FSC198 RecD       | (201) | SLNYNFSIISGGPGTGKTTTVAKLLLAIQMLNQNQRIALLAPTGKAAQR   |
| F.t.subsp.tularensis SCHU S4 RecD      | (201) | SLNYNFSIISGGPGTGKTTTVAKLLLAIQMLNQNQRIALLAPTGKAAQR   |
| Consensus                              | (201) | SLNYNFSIISGGPGTGKTTTVAKLLLAIQMLNQNQRIALLAPTGKAAQR   |
|                                        | 251   | 300                                                 |
| F. t. subsp. tularensis WY96-3418 RecD | (242) | MTESLKNTLATVIPSSLTTESTIQKNDIFKQVQDELNSVAQYLNLEAQT   |
| F.t. subsp.holarctica LVS RecD         | (242) | MTESLKNTLATVIPSSLTTESTIQKNDIFKQVQDELNSVAQYLNLEAQT   |
| F.t.subsp.holarctica FTNF002-00 RecD   | (242) | MTESLKNTLATVIPSSLTTESTIQKNDIFKQVQDELNSVAQYLNLEAQT   |
| F. t.subsp.mediasiatica FSC147 RecD    | (251) | MTESLKNTLATVIPSSLTTESTIQKNDIFKQVQDELNSVAQYLNLEAQT   |
| F.philomiragia ATCC 25017 RecD         | (242) | MRESINSVLSKRVNDNSYLG-----LSNLEAQT                   |
| F.t.subsp novicida U112 RecD           | (251) | MTESINSVLSKRVNDNSYLG-----LSNLEAQT                   |
| F.t.subsp. holarctica OSU18 RecD       | (251) | MTESLKNTLATVIPSSLTTESTIQKNDIFKQVQDELNSVAQYLNLEAQT   |
| F.t.subsp.tularensis FSC198 RecD       | (251) | MTESLKNTLATVIPSSLTTESTIQKNDIFKQVQDELNSVAQYLNLEAQT   |
| F.t.subsp.tularensis SCHU S4 RecD      | (251) | MTESLKNTLATVIPSSLTTESTIQKNDIFKQVQDELNSVAQYLNLEAQT   |
| Consensus                              | (251) | MTESLKNTLATVIPSSLTTESTIQKNDIFKQVQDELNSVAQYLNLEAQT   |
|                                        | 301   | 350                                                 |
| F. t. subsp. tularensis WY96-3418 RecD | (292) | IHRFLGLEPNSTVVKYNQSKAPFDVIIVDEASMLDMNIFIKLIRAVAN    |
| F.t. subsp.holarctica LVS RecD         | (292) | IHRFLGLEPNSTVVKYNQSKAPFDVIIVDEASMLDMNIFIKLIRAVAN    |

|                                        |       |                                                      |
|----------------------------------------|-------|------------------------------------------------------|
| F.t.subsp.holarctica FTNF002-00 RecD   | (292) | IHRFLGLRPNSTYVKYNEQSKAPFDVIIVDEASMLDMNIFIKLIRAVADN   |
| F. t.subsp.mediasiatica FSC147 RecD    | (301) | IHRFLGLRPNSTYVKYNEQSKAPFDVIIVDEASMLDMNIFIKLIRAVADN   |
| F.philomiragia ATCC 25017 RecD         | (270) | IHRFLGLRPNSTYVKYNEQSKAPFDVIIVDEASMLDMNIFIKLIRAVADN   |
| F.t.subsp novicida U112 RecD           | (279) | IHRFLGLRPNSTYVKYSKQSKAPFDVIIVDEASMLDMNIFIKLIRAVADN   |
| F.t.subsp. holarctica OSU18 RecD       | (301) | IHRFLGLRPNSTYVKYNEQSKAPFDVIIVDEASMLDMNIFIKLIRAVADN   |
| F.t.subsp.tularensis FSC198 RecD       | (301) | IHRFLGLRPNSTYVKYNEQSKAPFDVIIVDEASMLDMNIFIKLIRAVADN   |
| F.t.subsp.tularensis SCHU S4 RecD      | (301) | IHRFLGLRPNSTYVKYNEQSKAPFDVIIVDEASMLDMNIFIKLIRAVADN   |
| Consensus                              | (301) | IHRFLGLRPNSTYVKYNEQSKAPFDVIIVDEASMLDMNIFIKLIRAVADN   |
|                                        | 351   | 400                                                  |
| F. t. subsp. tularensis WY96-3418 RecD | (342) | TKLILIGDTNQLPSVEAGSLLANFTHDKYGSITPYTTLLIKNYRSQQYIN   |
| F.t. subsp.holarctica LVS RecD         | (342) | TKLILIGDTNQLPSVEAGSLLANFTHDKYGSITPYTTLLIKNYRSQQYIN   |
| F.t.subsp.holarctica FTNF002-00 RecD   | (342) | TKLILIGDTNQLPSVEAGSLLANFTHDKYGSITPYTTLLIKNYRSQQYIN   |
| F. t.subsp.mediasiatica FSC147 RecD    | (351) | TKLILIGDTNQLPSVEAGSLLANFTHDKYGSITPYTTLLIKNYRSQQYIN   |
| F.philomiragia ATCC 25017 RecD         | (320) | TKLILIGDTNQLPSVEAGSLLANFTHHDDGITPYTTLLIKNYRSQQYIN    |
| F.t.subsp novicida U112 RecD           | (329) | TKLILIGDTNQLPSVEAGSLLANFTHDKYGSITPYTTLLIKNYRSQQYIN   |
| F.t.subsp. holarctica OSU18 RecD       | (351) | TKLILIGDTNQLPSVEAGSLLANFTHDKYGSITPYTTLLIKNYRSQQYIN   |
| F.t.subsp.tularensis FSC198 RecD       | (351) | TKLILIGDTNQLPSVEAGSLLANFTHDKYGSITPYTTLLIKNYRSQQYIN   |
| F.t.subsp.tularensis SCHU S4 RecD      | (351) | TKLILIGDTNQLPSVEAGSLLANFTHDKYGSITPYTTLLIKNYRSQQYIN   |
| Consensus                              | (351) | TKLILIGDTNQLPSVEAGSLLANFTHDKYGSITPYTTLLIKNYRSQQYIN   |
|                                        | 401   | 450                                                  |
| F. t. subsp. tularensis WY96-3418 RecD | (392) | NLAASVLKGDVNIIDSQQNENIKFHSLRNLDTYLREYAKRYSQLEKCRDYK  |
| F.t. subsp.holarctica LVS RecD         | (392) | NLAASVLKGDVNIIDSQQNENIKFHSLRNLDTYLREYAKRYSQLEKCRDYK  |
| F.t.subsp.holarctica FTNF002-00 RecD   | (392) | NLAASVLKGDVNIIDSQQNENIKFHSLRNLDTYLREYAKRYSQLEKCRDYK  |
| F. t.subsp.mediasiatica FSC147 RecD    | (401) | NLAASVLKGDVNIIDSQQNENIKFHSLRNLDTYLREYAKRYSQLEKCRDYK  |
| F.philomiragia ATCC 25017 RecD         | (370) | NLAASVLKGDVNTDHNHQNENINFHSLRNLDTYLREYAKRYSQLEKCRDYK  |
| F.t.subsp novicida U112 RecD           | (379) | NLAASVLKGDVNIIDSHQNENINFHSLRNLDTYLREYAKRYSQLEKCRNDYK |
| F.t.subsp. holarctica OSU18 RecD       | (401) | NLAASVLKGDVNIIDSQQNENIKFHSLRNLDTYLREYAKRYSQLEKCRDYK  |
| F.t.subsp.tularensis FSC198 RecD       | (401) | NLAASVLKGDVNIIDSQQNENIKFHSLRNLDTYLREYAKRYSQLEKCRDYK  |
| F.t.subsp.tularensis SCHU S4 RecD      | (401) | NLAASVLKGDVNIIDSQQNENIKFHSLRNLDTYLREYAKRYSQLEKCRDYK  |
| Consensus                              | (401) | NLAASVLKGDVNIIDSQQNENIKFHSLRNLDTYLREYAKRYSQLEKCRDYK  |
|                                        | 451   | 500                                                  |
| F. t. subsp. tularensis WY96-3418 RecD | (442) | EALTELNKFRILVANKNLEIGTDKLNQKIEKFMSKPIDSNYKGRFIMITQ   |
| F.t. subsp.holarctica LVS RecD         | (442) | EALTELNKFRILVANKNLEIGTDKLNQKIEKFMSKPIDSNYKGRFIMITQ   |
| F.t.subsp.holarctica FTNF002-00 RecD   | (442) | EALTELNKFRILVANKNLEIGTDKLNQKIEKFMSKPIDSNYKGRFIMITQ   |
| F. t.subsp.mediasiatica FSC147 RecD    | (451) | EALTELNKFRILVANKNLEIGTDKLNQKIEKFMSKPIDSNYKGRFIMITQ   |
| F.philomiragia ATCC 25017 RecD         | (420) | EALTELNKFRILVANKNLEIGTDKLNQKIEKFMSKPIDSNYKGRFIMITQ   |
| F.t.subsp novicida U112 RecD           | (429) | EALTELNKFRILVANKNLEIGTDKLNQKIEKFMSKPIDSNYKGRFIMITQ   |
| F.t.subsp. holarctica OSU18 RecD       | (451) | EALTELNKFRILVANKNLEIGTDKLNQKIEKFMSKPIDSNYKGRFIMITQ   |
| F.t.subsp.tularensis FSC198 RecD       | (451) | EALTELNKFRILVANKNLEIGTDKLNQKIEKFMSKPIDSNYKGRFIMITQ   |
| F.t.subsp.tularensis SCHU S4 RecD      | (451) | EALTELNKFRILVANKNLEIGTDKLNQKIEKFMSKPIDSNYKGRFIMITQ   |
| Consensus                              | (451) | EALTELNKFRILVANKNLEIGTDKLNQKIEKFMSKPIDSNYKGRFIMITQ   |
|                                        | 501   | 550                                                  |
| F. t. subsp. tularensis WY96-3418 RecD | (492) | NSYSLGLFNGDVGILWPDDTGKLELYFDGKDAKAFSLNMLPKYESVYAMT   |

|                                        |       |                     |              |                                     |
|----------------------------------------|-------|---------------------|--------------|-------------------------------------|
| F.t. subsp.holarctica LVS RecD         | (492) | NSYSLGLFNGDVGIMW    | PDDTGKLR     | YFDGKDAKAFSLNMLPKYESVYAMT           |
| F.t.subsp.holarctica FTNF002-00 RecD   | (492) | NSYSLGLFNGDVGIMW    | PDDTGKLR     | YFDGKDAKAFSLNMLPKYESVYAMT           |
| F. t.subsp.mediasiatica FSC147 RecD    | (501) | NSYSLGLFNGDVGIMW    | PDDTGKLR     | YFDGKDAKAFSLNMLPKYESVYAMT           |
| F.philomiragia ATCC 25017 RecD         | (470) | NSYSLGLFNGDVGIMW    | PDDTGKLR     | YFDGKDAKAFSLNMLPKYESVYAMT           |
| F.t.subsp novicida U112 RecD           | (479) | NSYSLGLFNGDVGIMW    | PDDTGKLR     | YFDGKDAKAFSLNMLPKYESVYAMT           |
| F.t.subsp. holarctica OSU18 RecD       | (501) | NSYSLGLFNGDVGIMW    | PDDTGKLR     | YFDGKDAKAFSLNMLPKYESVYAMT           |
| F.t.subsp.tularensis FSC198 RecD       | (501) | NSYSLGLFNGDVGIMW    | PDDTGKLR     | YFDGKDAKAFSLNMLPKYESVYAMT           |
| F.t.subsp.tularensis SCHU S4 RecD      | (501) | NSYSLGLFNGDVGIMW    | PDDTGKLR     | YFDGKDAKAFSLNMLPKYESVYAMT           |
| Consensus                              | (501) | NSYSLGLFNGDVGIMW    | PDDTGKLR     | YFDGKDAKAFSLNMLPKYESVYAMT           |
|                                        |       | 551                 |              | 600                                 |
| F. t. subsp. tularensis WY96-3418 RecD | (542) | IHK                 | TQGSEFDEIVII | LPAEDNEALSKQLLYTAITRAKYKLTIISEQSSLR |
| F.t. subsp.holarctica LVS RecD         | (542) | IHK                 | TQGSEFDEIVII | LPAEDNEALSKQLLYTAITRAKYKLTIISEQSSLR |
| F.t.subsp.holarctica FTNF002-00 RecD   | (542) | IHK                 | TQGSEFDEIVII | LPAEDNEALSKQLLYTAITRAKYKLTIISEQSSLR |
| F. t.subsp.mediasiatica FSC147 RecD    | (551) | IHK                 | TQGSEFDEIVII | LPAEDNEALSKQLLYTAITRAKYKLTIISEQSSLR |
| F.philomiragia ATCC 25017 RecD         | (520) | IHK                 | TQGSEFDEIVII | LPAEDNEALCKQLLYTAITRAKYKLTIISEQSSLR |
| F.t.subsp novicida U112 RecD           | (529) | IHK                 | TQGSEFDEIVII | LPAEDNEALSKQLLYTAITRAKYKLTIISEQSSLR |
| F.t.subsp. holarctica OSU18 RecD       | (551) | IHK                 | TQGSEFDEIVII | LPAEDNEALSKQLLYTAITRAKYKLTIISEQSSLR |
| F.t.subsp.tularensis FSC198 RecD       | (551) | IHK                 | TQGSEFDEIVII | LPAEDNEALSKQLLYTAITRAKYKLTIISEQSSLR |
| F.t.subsp.tularensis SCHU S4 RecD      | (551) | IHK                 | TQGSEFDEIVII | LPAEDNEALSKQLLYTAITRAKYKLTIISEQSSLR |
| Consensus                              | (551) | IHK                 | TQGSEFDEIVII | LPAEDNEALSKQLLYTAITRAKYKLTIISEQSSLR |
|                                        |       | 601                 |              | 622                                 |
| F. t. subsp. tularensis WY96-3418 RecD | (592) | DIAQKIDIRNSNISELVSL | STQ          |                                     |
| F.t. subsp.holarctica LVS RecD         | (592) | DIAQKIDIRNSNISELVSL | STQ          |                                     |
| F.t.subsp.holarctica FTNF002-00 RecD   | (592) | DIAQKIDIRNSNISELVSL | STQ          |                                     |
| F. t.subsp.mediasiatica FSC147 RecD    | (601) | DIAQKIDIRNSNISELVSL | STQ          |                                     |
| F.philomiragia ATCC 25017 RecD         | (570) | DIAQKIDIRNSNISELVSL | NN-          |                                     |
| F.t.subsp novicida U112 RecD           | (579) | DIAQKIDIRNSNISELVSL | SD-          |                                     |
| F.t.subsp. holarctica OSU18 RecD       | (601) | DIAQKIDIRNSNISELVSL | STQ          |                                     |
| F.t.subsp.tularensis FSC198 RecD       | (601) | DIAQKIDIRNSNISELVSL | STQ          |                                     |
| F.t.subsp.tularensis SCHU S4 RecD      | (601) | DIAQKIDIRNSNISELVSL | STQ          |                                     |
| Consensus                              | (601) | DIAQKIDIRNSNISELVSL | STQ          |                                     |
